# 1 **Body saccades of *Drosophila* consist of stereotyped banked turns**

2 **Florian T. Muijres<sup>1,2,\*</sup>, Michael J. Elzinga<sup>1</sup>, Nicole A. Iwasaki<sup>1</sup>, Michael H. Dickinson<sup>1,3</sup>**

3 <sup>1</sup>University of Washington, Seattle, WA, USA

4 <sup>2</sup>Experimental Zoology Group, Wageningen University, Wageningen, the Netherlands

5 <sup>3</sup>Current address: California Institute of Technology, Pasadena, CA, USA

6 \*Corresponding author. E-mail: [florian.muijres@wur.nl](mailto:florian.muijres@wur.nl)

7  
8 Key Words: insect, biomechanics, aerodynamics, maneuvering flight, body saccades,  
9 wingbeat kinematics,

## 11 **SUMMARY**

12 The flight pattern of many fly species consists of straight flight segments interspersed with rapid  
13 turns called body saccades, a strategy that is thought to minimize motion blur. We analyzed the  
14 body saccades of fruit flies (*Drosophila hydei*), using high-speed 3D videography to track body  
15 and wing kinematics and a dynamically-scaled robot to study the production of aerodynamic  
16 forces and moments. Although the size, degree and speed of the saccades vary, the dynamics of  
17 the maneuver are remarkably stereotypic. In executing a body saccade, flies perform a quick roll  
18 and counter-roll, combined with a slower unidirectional rotation around their yaw axis. Flies  
19 regulate the size of the turn by adjusting the magnitude of torque that they produce about these  
20 control axes, while maintaining the orientation of the rotational axes in the body frame constant.  
21 In this way, body saccades are different from escape responses in the same species, in which the  
22 roll and pitch component of banking is varied to adjust turn angle. Our analysis of the wing

23 kinematics and aerodynamics showed that flies control aerodynamic torques during the saccade  
24 primarily by adjusting the timing and amount of span-wise wing rotation.

25

26

## INTRODUCTION

27 When exploring a local environment, many species of flies exhibit a flight pattern consisting of  
28 straight segments interspersed with rapid turns called body saccades (Collett and Land, 1975;  
29 Tammero and Dickinson, 2002; Wagner, 1986; Wehrhahn et al., 1982). This distinct flight  
30 pattern might serve many functions, but one likely advantage is that the quick turns allow flies to  
31 restrict the time periods during which their visual system is severely compromised by motion  
32 blur (Collett and Land, 1975; Hateren and Schilstra, 1999; Land, 1999; Schilstra and Hateren,  
33 1999). Whatever the function, it appears to be the preferred means of changing direction in some  
34 species. For example, a recent analysis of *Drosophila melanogaster* found that more than 80% of  
35 all changes in heading occur via body saccades (van Breugel et al., 2012).

36 There is some controversy regarding the neural mechanisms that trigger saccades in  
37 *Drosophila* (Dickinson, 2014). Several studies of both free and tethered flight behavior suggest  
38 that most saccades are triggered by visual expansion and thus represent collision avoidance  
39 reflexes that protect flies from flying into large obstacles or avoiding clutter (Censi et al., 2013;  
40 Reiser and Dickinson, 2013; Stewart et al., 2010; Tammero and Dickinson, 2002). Other studies,  
41 however, suggest that some saccades are triggered internally by a deliberately stochastic process  
42 that functions to optimize the animal's search efficiency (Maye et al., 2007; Reynolds and Frye,  
43 2007). In addition, flies exhibit rapid turns in other contexts, such as when they lose contact with  
44 an odor plume (van Breugel and Dickinson, 2014), or in response to a rapid visual expansion as  
45 might be created by an approaching predator (Muijres et al., 2014). It is not known, however,

46 whether rapid turns elicited by different stimuli or internal triggers operate via a single common  
47 motor program.

48         The aerodynamic basis of saccades, which is the main subject of this paper, has been  
49 investigated previously by Fry and coworkers using the fruit fly, *Drosophila melanogaster* (Fry  
50 et al., 2003). Based on a relatively small number of high speed video sequences, these authors  
51 proposed a model in which flies change course primarily by creating torque around their yaw  
52 axis (defined in that study as perpendicular to the longitudinal body axis), which they accomplish  
53 by simultaneously changing stroke amplitude and deviations out of the stroke plane. In addition,  
54 these authors reported that the changes in wing kinematics were biphasic, which they interpreted  
55 as indicating that flies generate first torque and then counter-torque during each maneuver.  
56 Finally, they presented a simple model in which the dynamics about the yaw axis were  
57 dominated by inertia during the brief maneuvers, consistent with the production of counter-  
58 torque (Fry et al., 2003). Subsequent authors, however, challenged some conclusions of this  
59 simple model. Hesselberg & Lehmann (2007) noted that due to the reciprocating pattern of wing  
60 motion, the damping about the yaw axis is quite large and should quickly dominate dynamics  
61 during turns – a calculation that was supported by subsequent models and measurements (Cheng  
62 et al., 2010; Dickson et al., 2010). Hedrick and coworkers (Hedrick et al., 2009) went so far as to  
63 suggest that animals over a very large size range need only produce a small amount of counter-  
64 torque during saccades, and can rely primarily on passive damping to coast to a stop after  
65 initiating a turn. Further, studies of corrective maneuvers in *Drosophila* suggested that flies  
66 generate yaw torque by regulating the angle of attack of the wing during the upstroke and  
67 downstroke, and not by altering either stroke amplitude or stroke deviation (Bergou et al., 2010).

68 In this paper, we employed 3D high-speed videography to capture the wing and body  
69 motion of the fruit fly, *Drosophila hydei*, during free flight body saccades. Although this study  
70 repeats the basic paradigm developed by Fry and coworkers over a decade ago (Fry et al., 2003),  
71 the improvements in high speed cameras as well as the utility of an automated machine vision  
72 tracking system allowed us to revisit saccade dynamics with greater resolution and statistical  
73 rigor. The results demonstrate that body saccades are a remarkably stereotyped behavior  
74 combining a brief banked turn (requiring rotation and counter-rotation in roll and pitch) with a  
75 unidirectional rotation about the yaw axis. By measuring the changes in wing motion during  
76 saccades and using a dynamically-scaled robot, we were able to determine the relative  
77 importance of different features of wing motion in generating forces and torques. The results  
78 help to resolve some of the recent controversies regarding the dynamics of saccadic turns in  
79 *Drosophila* and other insects.

80

81

## RESULTS

82

83

84

85

86

87

88

89

90

91

We tracked a total of 44 flight sequences (Fig. 1, see Materials and Methods), each  
consisting of a straight flight segment followed by a single body saccade (see Supplementary  
Movies S1,S2). Assuming that there is no difference between left and right hand turns, we  
mirrored all left hand turns, and then aligned all sequences based on time and heading with  
respect to the start of the saccade (Fig. 1E,F, see also Supplementary Movies S3-S6). Heading is  
defined as the angular direction of the flight path, not the body orientation. The saccadic turn  
angles ( $\Delta\sigma$ ), which quantify the total angular change in heading, varied substantially among  
saccades from approximately  $20^\circ$  to almost  $180^\circ$  (Fig. 1E,F, Fig. 2A,B), with an average of  
 $93^\circ \pm 27^\circ$  (mean  $\pm$  s.d.,  $n=44$ ). During the maneuvers, flight speed tended to dip briefly and then  
gradually rise (Fig. 2C). The duration of turn ( $\Delta t = t_{\text{stop}} - t_{\text{start}}$ ) was  $49 \pm 18$  ms ( $n=44$ ), or

92 approximately 9 wingbeats, although this is an underestimate of the entire maneuver because  $t_{\text{start}}$   
93 and  $t_{\text{stop}}$  were defined using finite thresholds (see Materials and Methods). These basic saccade  
94 metrics are similar to those previously reported on free flying *D. melanogaster* (Tammero &  
95 Dickinson 2002; Frye et al., 2003; van Breugel et al. 2012).

96 To examine how flies alter heading during saccades, we measured the magnitude and  
97 direction of horizontal and vertical accelerations throughout the maneuver (Fig. 2D-F).  
98 Immediately at the start of the saccade, flies generate a horizontal force that results in a sideways  
99 acceleration. The magnitude ( $a_{\text{hor}}/g$ ) of this sideways acceleration first increases and then  
100 decreases (Fig. 2E), while its orientation ( $\sigma_a$ ) remains relatively constant (Fig. 2D). Vertical  
101 acceleration ( $a_z/g$ ) remains near zero throughout the entire maneuver (Fig. 2F).

102 The time course of roll rate, pitch rate, and yaw rate during the maneuvers (Fig. 1C, 2G-I)  
103 along with their integrals and derivatives (Fig. S1) show that flies rotate about all principal body  
104 axes, and thus body saccades constitute a banked turn. Flies also increase force production so the  
105 vertical component remains roughly equal to body weight (Fig. 2J,F). The orientation of  $\mathbf{F}$  in the  
106 body reference frame remains constant (Fig. 2K,L), consistent with the so-called ‘helicopter  
107 model’ of insect flight (David, 1978; Götz and Wandel, 1984). Thus, as with more rapid escape  
108 maneuvers (Muijres et al., 2014), a fly generates sideways accelerations during saccades by  
109 rotating its body rather than by adjusting the orientation of the force vector in the body frame.

110 To determine how the flies control roll, pitch and yaw throughout the saccade, we  
111 estimated torque about these axes as the sum of torque required to overcome inertia (inertia  
112 torque) and torque required to overcome damping (damping torque) (Fig. 3, see Eqn 2 in  
113 Materials and Methods). Torque about the yaw axis consists mostly of damping torque  
114 confirming that yaw rotations during a saccade are highly damped (Hedrick et al., 2009;

115 Hesselberg and Lehmann, 2007). In contrast, torque about the roll axis consists about equally of  
116 inertial torque and damping torque, whereas damping torque about the pitch axis is negligible  
117 compared to inertial torque. The fact that rotations about the pitch axis are poorly damped during  
118 saccades is supported by a recent study of forward flight dynamics in fruit flies (Elzinga et al.,  
119 2014).

120 A simple means of implementing a banked turn would be to rotate the body about a fixed  
121 axis in the stroke plane and then to counter-rotate to continue level flight, while at the same time  
122 generating a yaw rotation to align body orientation with the new flight heading. The magnitude  
123 of the turn could then be adjusted by regulating the amount of torque produced, and not its  
124 direction. Evidence that flies might implement such a simple control scheme is shown in Fig. 4.  
125 The torque vectors for the primary rotation phase and the counter-rotation phase for all 44  
126 sequences (in blue and orange, respectively) aligned remarkably well (Fig. 4A,B). The average  
127 torque vector axes for the initial rotation and counter-rotation are defined as the primary torque  
128 axis  $\mu_1$  and the counter-torque axis  $\mu_2$ , which are oriented  $36^\circ$  and  $8^\circ$  from the longitudinal body  
129 axis, respectively. The time history of the direction (Fig. 4A) and magnitude (Fig. 4C,D) of the  
130 torque component in the stroke plane exhibits a biphasic shape indicative of rotation and counter-  
131 rotation about the  $\mu_1$  and  $\mu_2$  axis, respectively (Fig. 4C). In contrast, little torque is generated  
132 about the orthogonal axes ( $\mu_{1\perp}$  and  $\mu_{2\perp}$ , respectively, Fig. 4D; see also Fig. S2). Thus, animals  
133 execute the banked turn by generating torque and counter-torque about two control-axes ( $\mu_1$  and  
134  $\mu_2$ ) whose orientation remains constant from saccade to saccade (Fig. 4A,B). The magnitude of  
135 the torque produced about the control axes, however, does correlate with the turn angle (Fig 4F),  
136 which suggests the mechanism by which flies regulate the size of the heading change.

137 Simultaneously with the rotations about the  $\mu_1$  and  $\mu_2$  axes, but within a longer time  
138 scale, flies generate a unidirectional yaw torque in the same direction as the change in heading  
139 (Fig. 4E). Also, the magnitude of mean yaw torque during the turn is positively correlated with  
140 turn angle (Fig. 4H). Although not necessary for changing the direction of the flight path, the  
141 yaw rotation is required to align the longitudinal body axis with the new heading. This correction  
142 to minimize sideslip is not fully completed in most sequences due to limitations of our  
143 visualization volume (Fig. 4E). Note that by rotating about the yaw axis while its body is banked,  
144 the fly will generate a head down movement within the world frame of reference. This could  
145 explain why the initial body rotation axis  $\mu_1$  and counter-rotation axis  $\mu_2$  are not aligned and that  
146  $\mu_2$  includes a smaller pitch (down) component.

147 The sequence of 21 averaged wingbeats ( $n=44$  trials) show that all kinematic parameters  
148 (wingbeat frequency, stroke angle, deviation angle, and wing rotation angle, Fig. 1C) change  
149 during a saccade, and that these modifications are all very subtle (Fig. 5A-G). Wingbeat  
150 frequency increases by only a few Hz and all modifications in wing angles are less than  $5^\circ$ .  
151 Nevertheless, replaying the averaged kinematic sequence on the robotic fly generated normalized  
152 forces ( $|F|$ ) and torques ( $T_{\text{roll}}$ ,  $T_{\text{pitch}}$  and  $T_{\text{yaw}}$ ) that were similar to those estimated from body  
153 dynamics (using Eqns 1-2 in Materials & Methods, respectively, Fig. 5H-K). For example, the  
154 time history for the moment about the roll axis measured on the robotic fly exhibits the torque  
155 and counter-torque that is predicted from body dynamics (Fig. 5I). Thus, although the measured  
156 changes in wing motion are subtle, they appear sufficient to capture the requisite changes in  
157 forces and moments reasonably well. Because the robotic fly is fixed and cannot translate and  
158 rotate in response to the forces and moments it generates, we did not expect (nor obtain) a perfect  
159 match between the measured forces and moments and those calculated from body dynamics.

160 To better understand how flies modulate wingbeat kinematics to control torque around  
161 each individual control axis during a saccade, we extracted the wing kinematics associated with  
162 peak torque about the  $\mu_1$ ,  $\mu_2$ , and yaw axes from the entire dataset and replayed these kinematics  
163 on the robotic fly (Fig. 6, see Materials & Methods). The kinematics correlated with peak torque  
164 production exhibit distortion of all three wing angles (Fig. 6A-C), and when played through the  
165 robot, produced the expected torques (Fig. 6D-F). The fly's wing motion is able to create  
166 positive yaw torque throughout almost the entire wingbeat, with the exception of brief periods  
167 during stroke transitions (Fig. 6D). In contrast, torque production about the  $\mu_1$  and  $\mu_2$  axes is  
168 more complicated in that the time history includes both positive and negative excursions and the  
169 magnitude of the transient peaks are quite large relative to the average value (Fig. 6E). Most of  
170 the variations in torque production relative to the torque generated by the steady flight wingbeat  
171 (i.e. the symmetric wingbeat that produced weight support and no net torque, Fig 1D), occur at  
172 the start of the upstroke and downstroke, just after stroke reversal (Fig. 6E). The wingbeat  
173 patterns that generate peak torque about the  $\mu_1$  and  $\mu_2$  axes create very little mean torque about  
174 the orthogonal axes ( $\mu_{1\perp}$  and  $\mu_{2\perp}$ ), even throughout the magnitude of the oscillations through the  
175 stroke is quite large (Fig. 6F).

176 Next, we constructed a set of systematically distorted stroke patterns ranging from steady  
177 flight conditions to kinematics that generate peak torque about the  $\mu_1$ ,  $\mu_2$ , and yaw axes, and then  
178 replayed these on the robot (see Materials & Methods). For yaw, torque measured using the  
179 robot matched the values derived from body motion (Eqn 1) throughout the entire range of  
180 distorted kinematics (average difference  $\sim 2\%$ , Fig. 7A). For the  $\mu_1$  and  $\mu_2$  axes, the torques  
181 derived from body motion are about 66% and 59% (respectively) from that measured with  
182 robofly, suggesting that the dynamic model for roll and pitch (Eqns 2-4) may be oversimplified



183 or that the torque measured using a robot in a fixed reference frame do not accurately model the  
184 free flight case. We also measure the cross-talk (i.e. torque generated around orthogonal axes)  
185 produced by the kinematics associated with production of peak torque around the different  
186 torque axes. For the yaw case, the cross-talk about the roll and pitch axes was -24% and 27% of  
187  $|\mathbf{T}_{\text{yaw}}|$ , respectively (Fig. 7A). For the  $\mu_1$  case, the cross-talk about the  $\mu_{1\perp}$  and yaw axes was 3%  
188 and 45% of  $|\mathbf{T}\mu_1|$ , respectively, and for the  $\mu_2$  case, the cross-talk around the  $\mu_{2\perp}$  and yaw axes  
189 was 23% and 47% of  $|\mathbf{T}\mu_2|$ , respectively (Fig. 7B). The cross-talk between the yaw torque and  
190 torque about the axes in the stroke-plane (Fig. 7A,B) shows that our method did not enable us to  
191 completely separate the effect of torque and force production about the different principal axes.  
192 This is most likely due to the fact that during saccadic maneuvers, flies increase force production  
193 and produce torque about the different axes in synchrony. So, wingbeats that produced large  
194 torque about the axes in the stroke-plane tended to also produce high yaw torque and increased  
195 aerodynamic forces (Figure 5).

196 Next, we varied the kinematics for each of the three wing angles in isolation to determine  
197 their relative contribution to torque (Fig. 7C,D). As was also the case for evasive maneuvers  
198 (Muijres et al., 2014), the sum of torques resulting from modulating the different components of  
199 wing motion separately matches the torque generated by modulating all components  
200 simultaneously, indicating a remarkable degree of linearity. For all torque axes, wing rotation  
201 angle had the strongest effect on changes in total torque, whereas changes in stroke amplitude  
202 and stroke deviation contribute modestly to the control of torque around the  $\mu_1$  and  $\mu_2$  axes and  
203 make almost no contribution to the control of yaw torque (Fig. 7C,D).

204 As suggested by a previous study of *D. melanogaster*, a change in the mean offset of the  
205 rotation angle will create yaw torque by increasing the angle of attack during one half-stroke and

206 decreasing it on the other (Bergou et al., 2010). However, another means by which wing rotation  
207 might influence torque is through changes in the timing of wing rotation relative to stroke  
208 reversal, which can change forces via unsteady mechanisms (Dickinson et al., 1999). To explore  
209 the relative importance of these two potential mechanisms, we estimated both the relative phase  
210 shift and mean offset of the time course of the wing kinematic angles for the left and right wings  
211 during the strokes that generated peak torque (Figs 8, S3). Figure 8C-F shows that there is a  
212 phase shift of  $\sim 5^\circ$  in the wing rotation angle of the left wing relative to the right during wing  
213 strokes that produce peak torque around the  $\mu_1$  and  $\mu_2$  axes, but there is no evidence for a change  
214 in mean offset. In the case of yaw torque, a phase shift of  $\sim 3^\circ$  is accompanied by an offset of  $\sim 4^\circ$ .  
215 Thus, although torque about the yaw,  $\mu_1$ , and  $\mu_2$  axes are all primarily controlled by changes in  
216 the time course of wing rotation, our results suggest that the relative mechanisms are different.  
217 Flies regulate the torque about the  $\mu_1$  and  $\mu_2$  axes by modulating unsteady rotational lift  
218 mechanisms during stroke reversal (Dickinson et al., 1999), whereas yaw torque is controlled by  
219 a combination of unsteady effects at stroke reversal and differences in drag during the  
220 translational phase of the two half strokes (Bergou et al., 2010). This interpretation is consistent  
221 with the time history of the changes in torque throughout the wingbeat for the kinematics that  
222 produce peak torques (Fig. 6). Yaw torque is produced mostly during the translation phase of the  
223 wingbeat (Fig. 6D), which is indicative of an asymmetry in drag production between the two  
224 wings. In contrast, changes in torque about the  $\mu_1$  and  $\mu_2$  axes (relative to a steady wing stroke)  
225 occur mostly at the start of each wingstroke (Fig. 6E), suggesting modulations in rotational  
226 effects.

227  
228  
229  
230  
231  
232  
233  
234  
235  
236  
237  
238  
239  
240  
241  
242  
243  
244  
245  
246  
247  
248  
249  
250

## DISCUSSION

Our analysis showed that fruit flies perform body saccades by executing stereotyped banked turns (Fig. 2). The axes of the initial rotation ( $\mu_1$ ) and subsequent counter-rotation ( $\mu_2$ ) are aligned  $36^\circ$  and  $8^\circ$  from the roll axis of the fly, respectively (Fig. 4B). Flies control the size of the turn by regulating the magnitude of torque around these rotation axes (Fig. 4F), and not by adjusting their orientation as they do during more rapid escape maneuvers (Muijres et al., 2014). Flies also rotate unidirectionally around the yaw axis during saccades to correct for the misalignment between body orientation and heading (i.e. sideslip) that accumulates as a result of the banked turn.

Using a simple dynamic model, we were able to estimate the relative contribution of inertia and damping during a saccade (Fig. 3). We found that yaw dynamics are dominated by passive damping that results from the reciprocal flapping pattern, as suggested by Hesselberg & Lehmann (2007). Pitch dynamics, in contrast, are dominated by inertia, and the contribution of damping and inertia in roll dynamics is roughly equal. Thus, saccade dynamics are quite complex and accurate models must include both inertial and damping terms (Bergou et al., 2010; Cheng et al., 2010; Dickson et al., 2010; Fry et al., 2003; Hedrick et al., 2009; Hesselberg and Lehmann, 2007). The model for rapid turns proposed by Hedrick and coworkers (2009) in which insects rely primarily on passive damping to generate counter-torque may not be as general as proposed, assuming that other insects also employ banked turns and do not simply rotate about the yaw axis.

The maneuver that we have measured in fruit flies using high speed videography is similar to the body saccades of blowflies, measured elegantly by Schilstra & Hateren (1999) using tiny inductive coils. Thus, at least two species of flies, encompassing a rather large range

251 in scale, execute banks turns to produce rapid changes in flight direction. Given the high degree  
252 of similarity within their nervous systems, it is likely that body saccades of *Drosophila* and  
253 *Calliphora* are generated by homologous circuits.

254 Visually-elicited escape maneuvers (Muijres et al., 2014) and voluntary body saccades in  
255 fruit flies both consist of a banked turn, but the dynamics of the two maneuvers are different  
256 enough to suggest that they are produced by distinct motor programs. Although body saccades  
257 are fast, the changes in heading during evasive maneuver are faster, consistent with a more  
258 pronounced rotation of the body that reorients the mean force vector to produce a larger  
259 horizontal component. As a consequence, flies do not maintain weight support during the initial  
260 stages of an escape maneuver, whereas they do during body saccades (Fig. 2F,J). Similarly, yaw  
261 is poorly controlled during the initial stages of an evasive maneuver, resulting in large sideslip  
262 angles that are corrected long after the fly changes heading. During a body saccade, the yaw  
263 correction is better coordinated with the banked turn, so that sideslip is minimized throughout the  
264 maneuver. Perhaps the greatest difference between the two maneuvers relates to the manner by  
265 which the magnitude of the change in heading is controlled. Flies regulate the turn angle of a  
266 saccade by varying torque magnitude about two highly stereotypic axes ( $\mu_1$  and  $\mu_2$ ), whereas  
267 during evasive maneuvers the turn angle is controlled by adjusting the direction of the body  
268 rotation axis within the stroke plane. One interpretation that unifies all these differences is that  
269 evasive maneuvers may be optimized to alter flight heading as quickly as possible at the expense  
270 of flight control and motion blur, whereas body saccades are optimized to restrict retinal slip to a  
271 brief period.

272 The transition from rotation to counter-rotation during a body saccade is quite fast and  
273 such a pattern might be generated in a feed-forward manner by a central motor program or,

274 alternatively, the initial rotation might trigger the counter-rotation via a sensory-mediated reflex.  
275 The halteres are a likely source of such feedback, as they mediate compensatory reactions to  
276 imposed rotations (Dickinson, 1999; Nalbach, 1994; Ristroph et al., 2010; Sherman and  
277 Dickinson, 2003). Previous studies of saccades using a magnetic tether in which the animal is  
278 free to rotate about its yaw axis suggest that haltere feedback, but not visual feedback, plays a  
279 role in terminating saccades (Bender and Dickinson, 2006b). Interpretation of these prior  
280 experiments using magnetic tethers is complicated, however, by the new free flight data which  
281 show that *Drosophila* bank to change direction at the start of the saccade. Given their time  
282 course, the slow unidirectional saccade-like rotations that flies exhibit on magnetic tethers most  
283 likely represent the slower yaw phase of a free flight saccade. Thus, the manipulation  
284 experiments performed by Bender and Dickinson (Bender and Dickinson, 2006b) might indicate  
285 that haltere feedback is involved in regulating the duration of the slower yaw correction phase of  
286 a saccade but do not directly address the question of whether feedback triggers the faster  
287 counter-rotation phase of the initial banked turn.

288 By exploiting the high throughput capabilities of our tracking system, we were able to  
289 make accurate measurements of the changes in wing motion during saccades (Fig. 6). All three  
290 wing angles ( $\phi, \gamma, \alpha$ ) exhibit a biphasic modulation during the time course of the saccade, as  
291 expected from the production of torque and counter-torque (Fig. 5B-G). These data are  
292 consistent with the previous observations of Fry and coworkers (Fry et al., 2003), although these  
293 authors misinterpreted this biphasic pattern as indicating active breaking around the yaw axis,  
294 when it is more likely that they observed evidence for the counter-rotation about the  $\mu_2$  axis.  
295 Replaying the pattern of wing motion on a stationary robot generated a time history of forces and  
296 moments that matched those derived from free flight body dynamics reasonably well, but not

297 perfectly (Fig. 5H-K). The match for total flight force and yaw were quite good, whereas roll  
298 torque based on the wing kinematics and the robot measurements were larger than roll torque  
299 derived from body dynamics. This mismatch is perhaps not too surprising, given that the saccade  
300 basically consists of a rapid roll and counter-roll (i.e. the  $\mu_1$  and  $\mu_2$  axes are not too far off the  
301 roll axis). Thus, errors that derive from the fact that the kinematics from a rotating fly were  
302 replayed on a stationary robot would be particularly large for this degree of freedom. Other  
303 sources of error include the possible inaccuracies of our dynamics model, which did not include  
304 cross terms and used damping coefficients based on steady-state approximations.

305 By mining the entire database, we were able to determine the pattern of wing motion that  
306 correlated with peak torque production around the  $\mu_1$ ,  $\mu_2$ , and yaw axes (Fig. 6), and then to  
307 determine the relative contribution of the three wing angles to the moments by playing  
308 systematically distorted wing patterns through the robotic fly (Fig. 7). The results indicate that  
309 changes in the time history of the wing rotation angle, which strongly influences the angle-of-  
310 attack, are by far the most important for regulating torque about the  $\mu_1$ ,  $\mu_2$ , and yaw axes (Fig.  
311 7C,D). However, the torque modulations about the yaw axis and about the two axes in the stroke  
312 plane ( $\mu_1$  and  $\mu_2$ ) appear to occur via two distinct aerodynamic mechanisms (Fig. 8). As  
313 suggested by Bergou and coworkers (2010), changes in the mean offset of the wing rotation  
314 angle magnitude lowers the angle-of-attack during one half stroke while raising it on the other,  
315 thus producing an upstroke-to-downstroke imbalance in drag and thus net torque around the axis  
316 normal to the stroke plane. Although our results support this mechanism (Fig. 6A,D and Fig.  
317 7A,B), we also found that the flies adjust the relative phase of wing rotation as well, thus  
318 creating additional yaw torque via unsteady mechanisms at stroke reversal (Dickinson et al.,  
319 1999; Sane and Dickinson, 2002). Flies also create torque about the  $\mu_1$  and  $\mu_2$  axes via changes

320 in wing rotation angle, but in these cases the effect appears to be mediated almost entirely by  
321 changes in phase, and thus through unsteady effects at stroke reversal (Fig. 6E and Fig. 7C-F).  
322 One possible explanation for this difference is that changes in angle of attack during the  
323 translational portion of the stroke would be undesirable for regulating roll because they would  
324 generate large cross-talk in yaw torque.

325 A quite surprising result of our analysis was the relatively small importance of stroke  
326 amplitude and stroke deviation in the control of torque during saccades (Fig. 7C,D). This was  
327 particularly true for yaw torque, an observation that complicates interpretation of many tethered  
328 flight studies, which collectively show that flies generate large changes in stroke amplitude in  
329 response to both visual and mechanosensory rotations about the yaw axis (e.g. Sherman &  
330 Dickinson 2003), as well as transient spontaneous changes that have been ubiquitously  
331 interpreted as fictive saccades. These changes in stroke amplitude were quite large and clearly  
332 correlated with yaw torque (Tammero, 2004). Why do tethered flies generate such large changes  
333 in stroke amplitude that do not seem necessary to generate yaw torque in free flight? One  
334 possibility is that the stroke amplitude signal measured during fictive saccades is indicative of  
335 the roll and pitch required for a banking maneuver, and not for yaw production *per se*. If true,  
336 this has immediate implications for the underlying circuitry as it is noteworthy that the stroke  
337 amplitude changes associated with fictive saccades are unidirectional, i.e. there is no evidence of  
338 an attempt at a programmed counter-rotation.

339 Recently, Schnell and coworkers (Schnell et al., 2014) suggested that the basic optomotor  
340 circuit in *Drosophila* includes an integral feedback term that might be mediated by  $\text{Ca}^{2+}$   
341 dynamics in the terminals of the interneurons that encode horizontal rotation. Because the  
342 putative integrator winds up with prolonged stimulation, flies generate extremely large motor

343 responses during typical open-loop optomotor experiments. Although this hypothesis explains  
344 why the optomotor responses in tethered flight are so large relative to the kinematics changes  
345 exhibited during free flight maneuvers, it does not explain why flies generate such enormous  
346 changes in stroke amplitude when presented with stimuli that should elicit the production of yaw  
347 torque. Perhaps flies respond to visual rotation about the yaw axis by producing not just yaw  
348 torque but also roll torque, because they are attempting to turn via banking, as has been  
349 suggested by previous authors (Mronz and Lehmann, 2008). This hypothesis could be tested in  
350 the future by measuring free flight responses to horizontal motion.

351

## 352 **MATERIALS AND METHODS**

### 353 *Animals and experimental setup*

354 The methods used in this study were identical to those described in detail elsewhere  
355 (Muijres et al., 2014) and are only briefly outlined here. Experiments were performed on 1-to-5  
356 day old male and female *Drosophila hydei*, from a laboratory stock reared in a 14:10 (L:D) light  
357 cycle. Each day, approximately 50 one-day-old flies were released in the experimental chamber  
358 4 hours before their subjective dawn, after which experiments ran for 8 hours. The experimental  
359 chamber consisted of a transparent cylindrical enclosure, surrounded by a panoramic array of  
360 green LED panels (Reiser and Dickinson, 2008) that provided a uniform illumination of 70 lux.  
361 Flies were filmed using three synchronized high-speed cameras (Photron SA5 with AF Nikor  
362 60mm lenses, lens aperture =  $f/22$ ), which viewed the central portion of the arena from above and  
363 from two orthogonal side positions (Fig. 1A). The cameras operated at 7,500 frames per second  
364 with an image resolution of 1024x1000 pixels, exposure time of 1/30,000 second, and image  
365 depth of 12 bits. Due to limitations in optics, the region of interest was restricted to a cube ~40  
366 mm on each side. Each camera view was backlit using high intensity infrared light panels, which



367 were strobed in synchrony with every exposure. To maintain the inside temperature at  $\sim 25^{\circ}\text{C}$ , we  
368 passed refrigerated air around the outside of the flight chamber. At the start and end of each 5-  
369 day recording period, we calibrated the camera system using direct linear transformation (DLT)  
370 (Christoph Reinschmidt; <http://isbweb.org/software/movanal.html>).

371 Throughout each experimental session, the cameras sampled continuously. When a fly  
372 flew directly through the center of the region of interest, it tripped an infrared laser crossbeam,  
373 which automatically triggered the storage of 372 ms of data both before and after the trigger  
374 event. We captured more than 300 flight sequences, of which the majority consisted of a straight  
375 flight path, but occasionally a fly would perform a saccadic maneuver (Supplementary Movie  
376 S1). Although fruit flies are largely insensitive to infrared light, we were concerned that the high  
377 intensity of the IR trigger lasers might elicit behavioral responses. For this reason, we only  
378 analyzed the saccades that flies initiated before passing through the trigger point. Given our  
379 sampling methods, we have no way of knowing whether any given saccade was elicited by visual  
380 expansion or via some internal stochastic event.

381

### 382 *Measuring body and wingbeat kinematics*

383 We manually selected 44 sequences from the entire data set for detailed analysis, which  
384 we subjectively classified as body saccades based on visual inspection of the raw video  
385 sequences. To extract kinematics throughout these saccades, we used an automatic machine-  
386 vision system as described in a recent analysis of escape maneuvers (Fig. 1B) (Muijres et al.,  
387 2014). The tracking routine provided us with Kalman filtered estimates of the body and wing  
388 kinematics throughout each flight sequence (Fig. 1C, Supplementary Movie S2) (Muijres et al.,  
389 2014).

390 For all Kalman filters, the cross-product values in the error covariance matrices ( $\mathbf{R}$  and  
391  $\mathbf{Q}$ ) were set to zero, and covariance matrix  $\mathbf{R}$  was set to identity. Thus, adjusting the parameters  
392 in covariance matrix  $\mathbf{Q}$  controlled Kalman smoothing. For positional data, we used a linear  
393 Kalman filter and the smoothing parameters of matrix  $\mathbf{Q}$  were scaled according to a Taylor  
394 series.  $\mathbf{Q}$  values corresponding to position were set to  $dt^2$ , velocity values were set to 1, and  
395 acceleration values were set to  $1/dt^2$ , where  $dt$  is the time step between two measurements  
396 (inverse of the frame rate).

397 To filter body and wing orientation data, we used an extended Kalman filter with two  
398 filtering steps (Yun & Bachmann, 2006), because quaternion update is non-linear. For body  
399 orientation filtering, we used the following  $\mathbf{Q}$  parameters. For the first iteration,  $\mathbf{Q}$  parameters  
400 associated with angular velocities and angular accelerations were set to zero, and parameters  
401 associated with quaternions were set to 0.003. For the second iteration, angular velocity  
402 parameters were set to 0.0001, angular acceleration parameters were set to  $0.0001/dt^2$ , and  
403 quaternion parameters were set to 1. For wing orientation filtering, we used a similar strategy but  
404 less smoothing was desired. For the first iteration, angular velocity parameters and angular  
405 acceleration parameters were set to zero, and quaternion parameters in  $\mathbf{Q}$  were set to 1. For the  
406 second iteration, angular velocity parameters in  $\mathbf{Q}$  were set to  $1/dt^2$ , angular acceleration  
407 parameters were set to 0, and quaternion parameters were set to 1.

408 Body position data consists thus of Kalman filtered estimates of position,  $\mathbf{X}(t)$ , velocity,  
409  $\mathbf{U}(t)$ , and linear acceleration,  $\mathbf{a}(t)$ . Based on  $\mathbf{U}(t)$  and  $\mathbf{a}(t)$ , we determined the start and end of  
410 each saccade by estimating horizontal accelerations normal and tangential to the flight path ( $a_N(t)$   
411 and  $a_T(t)$ , respectively). Using an expectation maximization-based clustering analysis on  $a_N(t)$   
412 and  $a_T(t)$  for all measured flight sequences (Muijres et al., 2014), we divided flight sequences

413 into steady and maneuvering segments, such that steady segments satisfied  $a_N < 0.19g$  and -  
 414  $0.17g < a_T < 0.14g$ , where  $g$  is gravitational acceleration. The times at which a saccade starts ( $t_{\text{start}}$ )  
 415 and ends ( $t_{\text{end}}$ ) were defined as the moments when body accelerations passed these threshold  
 416 values. Note that these points in time do not encompass the entire length of the maneuver, but the  
 417 method enabled us to systematically and objectively define and align the saccades.

418 Based on the velocity data, we determined flight heading,  $\sigma(t)$ , which we used to  
 419 determine the turn angle,  $\Delta\sigma$ , for each saccade.  $U(t)$  was also used to determine changes in flight  
 420 speed,  $dU(t)$ , throughout the maneuver relative to the start of each sequence. Linear acceleration,  
 421  $\mathbf{a}(t)$ , was used to estimate the direction,  $\sigma_a$ , and magnitude,  $a_{\text{hor}}/g$ , of normalized acceleration  
 422 within the horizontal plane, as well as the magnitude of the vertical acceleration,  $a_z/g$ . Body  
 423 orientation was expressed in the body Euler angles (yaw,  $\psi_E$ ; pitch,  $\theta_E$ ; and roll,  $\eta_E$ ) in the world  
 424 reference frame and normalized angular velocity of the body,  $\boldsymbol{\Omega} = \{\omega_x, \omega_y, \omega_z\}$ , in the body  
 425 reference frame (Fig. 1C). All rotation rates were normalized using  $f_{\text{steady}}$ , where  $f_{\text{steady}}$  is the  
 426 wingbeat frequency during steady flight for *D. hydei*, (~ 189 Hz, from Muijres et al. 2014).

427 Each tracked wingbeat was expressed by the wingbeat frequency,  $f$ , and three Euler  
 428 angles within the body reference frame: wing stroke angle,  $\phi$ , stroke deviation angle,  $\gamma$ , and wing  
 429 rotation angle,  $\alpha$  (Fig. 1C). Note that all body and wing orientation variables are defined relative  
 430 to the stroke plane, which is defined as horizontal during steady flight (Fig. 1C). For *D. hydei*,  
 431 this is at an inclination angle of  $47.5^\circ$  relative to the long axis of the body (Muijres et al., 2014).

432

### 433 *Estimating aerodynamic forces and torques based on body dynamics*

434 The aerodynamic forces throughout a flight maneuver can be estimated directly from  
 435 body accelerations as:

436

437  $\mathbf{F}(t) = (\mathbf{a}(t) + \mathbf{g})/|\mathbf{g}|,$  (1)

438

439 where  $\mathbf{F}$  is the aerodynamic force vector normalized with body weight,  $mg$ , and  $\mathbf{g} = \{0, 0, g\}$  is  
440 the gravitational acceleration vector. The orientation of this force vector in the body frame was  
441 defined as the roll ( $\zeta$ ) and pitch ( $\beta$ ) angle of  $\mathbf{F}$  relative to the stroke-plane normal (Fig. 1C), and  
442 is calculated based on the body Euler angles and  $\mathbf{F}$ .

443 The aerodynamic torque produced throughout a maneuver was estimated from the body  
444 rotations. Because aerodynamic damping has been shown to be an important source of passive  
445 stability in flapping flight (Hesselberg and Lehmann, 2007; Hedrick et al. 2009), we estimate  
446 normalized torque  $\mathbf{T}$  using a linear model based on both normalized angular velocities and  
447 accelerations:

448

449  $\mathbf{T}(t) = \mathbf{C} \boldsymbol{\Omega}(t) + \mathbf{I} \dot{\boldsymbol{\Omega}}(t),$  (2)

450

451 where  $\dot{\boldsymbol{\Omega}}$  is the angular acceleration vector of the body normalized by  $f_{\text{steady}}^2$ , and which is  
452 estimated by numerically differentiating  $\boldsymbol{\Omega}$ .  $\mathbf{C}$  is the aerodynamic damping coefficient matrix  
453 normalized by  $mgll/f_{\text{steady}}$ , where  $l$  is wing length, and  $\mathbf{I}$  is the body inertia matrix normalized by  
454  $mgll/f_{\text{steady}}^2$ . Because aerodynamic torque produced by a wing scales with the product of force and  
455 wing length, we normalized torque by  $|\mathbf{a} + \mathbf{g}|ml$ . We modeled  $\mathbf{C}$  as

456

457  $\mathbf{C} = \begin{bmatrix} C_{roll} & 0 & 0 \\ 0 & C_{pitch} & 0 \\ 0 & 0 & C_{yaw} \end{bmatrix},$  (3)

458

459 and  $\mathbf{I}$  as

460

$$461 \quad \mathbf{I} = \begin{bmatrix} I_{roll} & 0 & 0 \\ 0 & I_{pitch} & 0 \\ 0 & 0 & I_{yaw} \end{bmatrix}. \quad (4)$$

462

463 Thus, our simplified model assumes that all interaction coefficients in both  $\mathbf{C}$  and  $\mathbf{I}$  are  
464 negligible.

465 The damping coefficients in  $\mathbf{C}$  were based on damping estimates for *D. melanogaster*  
466 reported in literature (Cheng et al., 2009; Dickson et al., 2010). The yaw-damping coefficient for  
467 *D. hydei* ( $C_{yaw}$ ) was estimated by scaling values measured for *D. melanogaster* using a robotic  
468 model (Dickson et al., 2010). Roll and pitch damping for *D. hydei* were based on computational  
469 estimates of damping coefficients in *D. melanogaster* (Cheng et al., 2009). For consistency  
470 among the damping coefficients for the three degrees-of-freedom, we first linearly scaled all  
471 damping coefficients estimated for *D. melanogaster* by Cheng et al. (2009) equally, such that  
472 yaw damping was equal to that reported by Dickson et al. (2010), and then scaled these values to  
473 the slightly larger species, *D. hydei*. This resulted in the following normalized roll, pitch, and  
474 yaw damping coefficients:  $C_{roll} = 0.22$ ;  $C_{pitch} = 0.08$ ;  $C_{yaw} = 0.41$ . Note that the damping  
475 coefficient for yaw is 5 times greater than for pitch and twice as large as that for roll.

476 Inertia coefficients within the stroke-plane reference frame were estimated based on a  
477 cylindrical body model with body mass  $m$  and pitch angle of  $47.5^\circ$  and a wing model consisting  
478 of a horizontal disk divided into 100 concentric rings (Fig. 1C). Each ring has a homogeneously  
479 distributed mass equal to the mass of the local spanwise wing section plus its added fluid mass.

480 Following (Ellington, 1984), total wing mass was estimated as 5% of body mass, and added mass  
481 was equal to a cylindrical fluid mass circumventing each wing section. This resulted in  
482 normalized roll inertia  $I_{\text{roll}} = 0.64$ , normalized pitch inertia  $I_{\text{pitch}} = 1.07$ , and normalized yaw  
483 inertia  $I_{\text{yaw}} = 0.57$ .

484

### 485 *Correlating wingbeat kinematics with torque production*

486 To determine how a fly controls torque throughout a saccade, we correlated changes in  
487 wing kinematics with torques estimated from body dynamics (Eqn 2). Wing kinematics were  
488 correlated with torque about an axis defined by a torque vector,  $\mathbf{T}'$ , by parsing the complete  
489 dataset into steady wingbeats and wingbeats in which the fly generated some absolute magnitude  
490 of  $\mathbf{T}'$  ( $|\mathbf{T}'|$ ) that was larger than one standard deviation of the entire distribution of  $|\mathbf{T}'|$  for all  
491 wingbeats in the dataset. Changes in kinematics angles throughout a wingbeat relative to the  
492 steady wingbeat angles were linearly correlated with the stroke-averaged normalized torque  
493 estimated from body dynamics (Eqn 2) as:

494

$$495 \text{mod}(\kappa, \mathbf{T}')_i = (\kappa_i - \kappa_{\text{steady}}) / |\mathbf{T}'|_i, \quad (5)$$

496

497 where  $\text{mod}(\kappa, \mathbf{T}')_i$  is the wingbeat modification variable for kinematic angle  $\kappa$  (representing  
498 either  $\phi$ ,  $\gamma$ , or  $\alpha$ ) of the  $i^{\text{th}}$  wingbeat in the dataset of  $|\mathbf{T}'|$  producing wingbeats.  $\kappa_{\text{steady}}$  is the  
499 equivalent kinematics angle distribution of the average steady wingbeat of *D. hydei*, based on  
500 1603 wingbeats measured by Muijres et al. (2014) (Fig. 1D).

501 Variation in wingbeat frequency (which is equal for both wings) is excluded from this  
502 analysis because such modulation could not alter torque directly. By fitting a Fourier series

503 through the complete dataset of  $mod(\kappa, \mathbf{T}')$ , we determined the average wing kinematics  
504 modulation distributions,  $MOD(\kappa, \mathbf{T}')$  for each kinematics angle and torque axis. Fourier series  
505 were fitted using a Levenberg-Marquardt algorithm and are defined as:

506

$$507 \quad k(t^*) = a_0 + \sum_{n=1}^N a_n \cos(2\pi n t^*) + b_n \sin(2\pi n t^*), \quad (6)$$

508

509 where  $a_n$  and  $b_n$  are the Fourier series coefficients for the  $n^{\text{th}}$  order, and  $\tau$  is normalized time for  
510 each wingbeat ( $t^* = t f$ ). All Fourier series ( $MOD(\phi, \mathbf{T}')$ ,  $MOD(\gamma, \mathbf{T}')$ ,  $MOD(\alpha, \mathbf{T}')$ ) were 8<sup>th</sup> order  
511 ( $N=8$ ). From the  $MOD(\kappa, \mathbf{T}')$  estimates, the set of wing kinematics variables that would result in a  
512 given amount of torque  $|\mathbf{T}'|$  about torque axis  $\mathbf{T}'$  can be reconstructed by:

513

$$514 \quad \kappa = \kappa_{\text{steady}} + |\mathbf{T}'| MOD(\kappa, \mathbf{T}'). \quad (7)$$

515

### 516 *Measuring aerodynamic forces and torques using a dynamically scaled robot*

517 Apart from estimating aerodynamic forces and torques from body dynamics (Eqn 1 and Eqn 2,  
518 respectively), we also estimated forces and torques from wing kinematics, using a dynamically  
519 scaled robot in a fixed body reference frame (Dickinson et al., 1999). This technique enabled us  
520 to study the aerodynamics of saccadic maneuvers in a systematic and detailed manner. We  
521 replayed the wingbeat kinematics in a fixed body reference frame because aerodynamic and  
522 inertial effects of body rotations were modeled using Eqn 2. Note that aerodynamics effects due  
523 to body translations were ignored.

524 To assess the accuracy of our methods, we compared torque measurements based on the  
525 wingbeat kinematics with the torque estimates based on body dynamics (Eqn 2). This analysis  
526 was performed on two sets of data. The first dataset consisted of the mean wing kinematics and  
527 body dynamics throughout the average saccade, estimated by aligning the wingbeats from all  
528 maneuvers. This enabled us to test qualitatively whether the measured changes in wingbeat  
529 kinematics captured the forces and torques produced throughout the saccade. The second dataset  
530 was based on the systematic analysis described above, in which we correlated wingbeat  
531 kinematics with torque production. Using Eqn 7, we constructed a set of kinematics patterns that  
532 should produce a systematically increasing amount of body torque about a specific body axis  $\mathbf{T}^*$ .  
533 The range of body torques was chosen such that it captured the complete behavioral envelope of  
534 measured torque production. We defined a body torque distribution spanning a range from zero  
535 body torque (steady flight) to a torque equal to approximately three times the standard deviation  
536 of the  $|\mathbf{T}^*|$  distribution for all measured wingbeats, and parsed it into 8 values. For each, we  
537 created the matching deformed wingbeat kinematics using Eqn 7. We then replayed the set of  
538 systematically distorted wing kinematics on the robotic fly and measured the resulting stroke-  
539 averaged forces and torques about all three orthogonal body axes, and compared these values  
540 with the values of body torques. This approach also enabled us to determine cross-talk between  
541 torque modulations about the different orthogonal axes. The distributions of  $|\mathbf{T}^*|$  and the  
542 corresponding wing kinematics constructed using Eqn 7 were also used to study the effects of  
543 stroke, deviation, and wing rotation angle on torque production. Using a method similar to that  
544 described by Muijres et al. (2014), we systematically modulated one wing kinematics variable,  
545 while maintaining steady kinematics for the other angles, and replayed these on the robot.



546 Cases in which body torque was equal to three standard deviations of the  $|\mathbf{T}^*|$  distribution,  
 547 which we considered as an estimate for peak torque production, were analyzed in more detail  
 548 using two complementary methods. First, we replayed the wingbeat kinematics that  
 549 corresponded to this peak torque (estimated using Eqn 7) on the robot and measured force and  
 550 torque throughout the wingbeat. Second, we analyzed the changes in wing kinematics that result  
 551 in peak torque production. For each kinematic angle, the difference in kinematics between the  
 552 left and right wing might result from temporal phase shift, from a shift in the mean value, or  
 553 from higher order modulations in the time history (Fig. 1D). For each kinematic variable, we  
 554 estimated the temporal phase shift and offset in mean value between the left and right wing by  
 555 systematically translating the left wing data along the time ( $\tau$ ) and ordinate ( $\kappa$ ) axes. For each  
 556 combination of  $\Delta\tau$  and  $\Delta\kappa$ , we determined the root mean square error (RMSE) between the right  
 557 wing and shifted left wing values. The combination of  $\Delta\tau$  and  $\Delta\kappa$  at which RMSE was minimum  
 558 defines the phase shift an angular offset between left and right wing for that wing kinematics  
 559 angle and  $|\mathbf{T}^*|$  axis combination. The corresponding magnitude of RMSE quantifies how well the  
 560 wing kinematics modulations are described by  $\Delta\tau$  and  $\Delta\kappa$ , relative to any higher order  
 561 modulations.

### List of symbols and abbreviations

|                                  |                                                               |
|----------------------------------|---------------------------------------------------------------|
| $A$                              | Amplitude                                                     |
| $\mathbf{a} = \{a_x, a_y, a_z\}$ | Acceleration vector in the world reference frame              |
| $a_N$                            | Horizontal acceleration normal to the flight path             |
| $a_T$                            | Horizontal acceleration tangential to the flight path         |
| $a_n$                            | Fourier series coefficient                                    |
| $b_n$                            | Fourier series coefficient                                    |
| $dt$                             | Time step between measurements (inverse of camera frame rate) |
| $C$                              | Normalized aerodynamic damping coefficient matrix             |

|                          |                                                                               |
|--------------------------|-------------------------------------------------------------------------------|
| $dU$                     | Flight speed relative to the start of the maneuver                            |
| $F$                      | Normalized aerodynamic force vector in the world reference frame              |
| $f$                      | Wingbeat frequency                                                            |
| $\mathbf{g} = \{0,0,g\}$ | Gravitational acceleration vector                                             |
| $g$                      | Gravitational acceleration scalar                                             |
| $I$                      | Normalized inertia coefficient matrix                                         |
| $l$                      | Wing length                                                                   |
| $m$                      | Body mass                                                                     |
| $mg$                     | Body weight                                                                   |
| $Q$                      | Error covariance matrix of Kalman filter                                      |
| $R$                      | Error covariance matrix of Kalman filter                                      |
| $T$                      | Normalized aerodynamic torque vector in the body reference frame              |
| $T'$                     | An arbitrarily defined aerodynamic torque vector                              |
| $t$                      | Time relative to the start of the saccade                                     |
| $t^*$                    | Normalized time within a wingbeat relative to the start of the downstroke     |
| $U = \{u,v,w\}$          | Velocity vector in the world reference frame                                  |
| $X = \{x,y,z\}$          | Position vector in the world reference frame                                  |
| $X_B = \{x_B,y_B,z_B\}$  | Position vector in the body reference frame                                   |
| $\alpha$                 | Rotation angle of the wing around its long axis                               |
| $\beta$                  | Pitch angle of the aerodynamic force vector in the body reference frame       |
| $\gamma$                 | Deviation angle of the wing out of the stroke plane                           |
| $\Delta\alpha$           | Shift of the mean wing rotation angle of the left wing relative to the right  |
| $\Delta\tau$             | Phase shift of the left wing movement relative to the right wing movement     |
| $\Delta\kappa$           | Shift of the mean wing kinematic angle of the left wing relative to the right |
| $\Delta\sigma$           | Turn angle of the saccade                                                     |
| $\Delta t$               | Duration of a saccadic turn                                                   |
| $\eta$                   | Body roll angle derived from roll rate $\omega_x$                             |
| $\eta_E$                 | Body roll Euler angle in the world reference frame                            |
| $\theta$                 | Body pitch angle derived from pitch rate $\omega_y$                           |

|                                             |                                                                                                  |
|---------------------------------------------|--------------------------------------------------------------------------------------------------|
| $\theta_E$                                  | Body pitch Euler angle in the world reference frame                                              |
| $\kappa$                                    | Wing kinematics angles                                                                           |
| $\mu$                                       | Torque axis angle within the stroke plane relative to the roll torque axis                       |
| $\mu_1$                                     | Primary torque axis angle (mean torque angle during the initial phase of the banked turn)        |
| $\mu_{1\perp}$                              | Angle within the stroke plane and orthogonal to $\mu_1$                                          |
| $\mu_2$                                     | Counter-torque axis angle (mean torque angle during the counter-torque phase of the banked turn) |
| $\mu_{2\perp}$                              | Angle within the stroke plane and orthogonal to $\mu_2$                                          |
| $\xi$                                       | Roll angle of the aerodynamic force vector in the body reference frame                           |
| $\sigma$                                    | Heading (the direction of the horizontal body velocity component)                                |
| $\sigma_a$                                  | Direction of horizontal body acceleration component                                              |
| $\tau$                                      | Phase within a wingbeat relative to the start of the downstroke                                  |
| $\phi$                                      | Stroke angle of the wing within the stroke plane                                                 |
| $\psi$                                      | Body yaw angle derived from yaw rate $\omega_z$                                                  |
| $\psi_E$                                    | Body yaw Euler angle in the world reference frame                                                |
| $\Omega = \{\omega_x, \omega_y, \omega_z\}$ | Normalized rotation rate vector of the body in the body reference frame                          |
| $\omega_x$                                  | Normalized body roll rate in the body reference frame                                            |
| $\omega_y$                                  | Normalized body pitch rate in the body reference frame                                           |
| $\omega_z$                                  | Normalized body yaw rate in the body reference frame                                             |

563

564

### Acknowledgements

565 The authors wish to thank Johan Melis, Steve Safarik, and Darren Howell for help with this  
566 project.

567

568

### Competing interests

569 The authors declare no competing financial interests.

570

571

**Author contributions**

572 F.T.M and M.H.D planned experiments and wrote the paper. F.T.M. and N.A.I. collected data in  
 573 flight arena, ran the automated machine vision tracking software, and identified sequences with  
 574 saccadic turns. M.J.E. collected data using the robotic fly. F.T.M. analyzed the data, with the  
 575 help of M.J.E. and M.H.D.

576

577

**Funding**

578 This research was supported by grants (to M.H.D) from the Air Force Office of Scientific  
 579 Research (FA9550-10-1-0368), the Paul G. Allen Family Foundation, and the U.S. Army  
 580 Research Laboratory (DAAD 19-03-D-0004) and (to F.T.M.) the Swedish Research Council  
 581 (Vetenskapsrådet).

582

583

**References**

584 **Bender, J. A. and Dickinson, M. H.** (2006a). Visual stimulation of saccades in magnetically tethered *Drosophila*. *J.*  
 585 *Exp. Biol.* **209**, 3170–82.

586 **Bender, J. A. and Dickinson, M. H.** (2006b). A comparison of visual and haltere-mediated feedback in the control  
 587 of body saccades in *Drosophila melanogaster*. *J. Exp. Biol.* **209**, 4597–606.

588 **Bergou, A. J., Ristroph, L., Guckenheimer, J., Cohen, I. and Wang, Z. J.** (2010). Fruit Flies Modulate Passive  
 589 Wing Pitching to Generate In-Flight Turns. *Phys. Rev. Lett.* **104**, 148101.

590 **Censi, A., Straw, A. D., Sayaman, R. W., Murray, R. M. and Dickinson, M. H.** (2013). Discriminating external  
 591 and internal causes for heading changes in freely flying *Drosophila*. *PLoS Comput. Biol.* **9**, e1002891.

592 **Cheng, B., Fry, S. N., Huang, Q., Dickson, W. B., Dickinson, M. H. and Deng, X.** (2009). Turning dynamics and  
 593 passive damping in flapping flight. *2009 IEEE Int. Conf. Robot. Autom.* 1889–1896.

594 **Cheng, B., Fry, S. N., Huang, Q. and Deng, X.** (2010). Aerodynamic damping during rapid flight maneuvers in the  
 595 fruit fly *Drosophila*. *J. Exp. Biol.* **213**, 602–12.

596 **Collett, T. and Land, M.** (1975). Visual control of flight behavior in hoverfly, *Syricta pipiens*. *J. Comp. Physiol.*  
 597 **99**, 1–66.

598 **David, C.** (1978). The relationship between body angle and flight speed in free-flying *Drosophila*. *Physiol. Entomol.*  
 599 **3**, 191–195.

600 **Dickinson, M. H.** (1999). Haltere-mediated equilibrium reflexes of the fruit fly, *Drosophila melanogaster*. *Philos.*  
 601 *Trans. R. Soc. Lond. B. Biol. Sci.* **354**, 903–16.

602 **Dickinson, M. H.** (2014). Death Valley, *Drosophila*, and the Devonian toolkit. *Annu. Rev. Entomol.* **59**, 51–72.

- 603 **Dickinson, M. H., Lehmann, F.-O. and Sane, S. P.** (1999). Wing rotation and the aerodynamic basis of insect  
604 flight. *Science (80-. )*. **284**, 1954–1960.
- 605 **Dickson, W. B., Polidoro, P., Tanner, M. M. and Dickinson, M. H.** (2010). A linear systems analysis of the yaw  
606 dynamics of a dynamically scaled insect model. *J. Exp. Biol.* **213**, 3047–61.
- 607 **Ellington, C. P.** (1984). The aerodynamics of hovering insect flight. I. The quasi-steady analysis. *Philos. Trans. R.*  
608 *Soc. Lond. B. Biol. Sci.* **305**, 1–15.
- 609 **Elzinga, M. J., van Breugel, F. and Dickinson, M. H.** (2014). Strategies for the stabilization of longitudinal  
610 forward flapping flight revealed using a dynamically-scaled robotic fly. *Bioinspir. Biomim.* **9**, 025001.
- 611 **Fry, S. N., Sayaman, R. and Dickinson, M. H.** (2003). The aerodynamics of free-flight maneuvers in *Drosophila*.  
612 *Science* **300**, 495–8.
- 613 **Götz, K. and Wandel** (1984). Optomotor control of the force of flight in *Drosophila* and *Musca*. *Biol. Cybern.*
- 614 **Hateren, J. and Schilstra, C.** (1999). Blowfly flight and optic flow. II. Head movements during flight. *J. Exp. Biol.*  
615 **1500**, 1491–1500.
- 616 **Hedrick, T. L., Cheng, B. and Deng, X.** (2009). Wingbeat time and the scaling of passive rotational damping in  
617 flapping flight. *Science (80-. )*. **324**, 252–255.
- 618 **Hesselberg, T. and Lehmann, F.-O.** (2007). Turning behaviour depends on frictional damping in the fruit fly  
619 *Drosophila*. *J. Exp. Biol.* **210**, 4319–34.
- 620 **Land, M. F.** (1999). Motion and vision: why animals move their eyes. *J. Comp. Physiol. A*. **185**, 341–52.
- 621 **Maye, A., Hsieh, C.-H., Sugihara, G. and Brembs, B.** (2007). Order in spontaneous behavior. *PLoS One* **2**, e443.
- 622 **Mronz, M. and Lehmann, F.-O.** (2008). The free-flight response of *Drosophila* to motion of the visual  
623 environment. *J. Exp. Biol.* **211**, 2026–45.
- 624 **Muijres, F. T., Elzinga, M. J., Melis, J. M. and Dickinson, M. H.** (2014). Flies Evade Looming Targets by  
625 Executing Rapid Visually Directed Banked Turns. *Science (80-. )*. **344**, 172–177.
- 626 **Nalbach, G.** (1994). The halteres of the blowfly *Calliphora* II. Three-dimensional organization of compensatory  
627 reactions to real and simulated rotations. *J. Comp. Physiol. A* 695–708.
- 628 **Reiser, M. B. and Dickinson, M. H.** (2008). A modular display system for insect behavioral neuroscience. *J.*  
629 *Neurosci. Methods* **167**, 127–39.
- 630 **Reiser, M. B. and Dickinson, M. H.** (2013). Visual motion speed determines a behavioral switch from forward  
631 flight to expansion avoidance in *Drosophila*. *J. Exp. Biol.* **216**, 719–32.
- 632 **Reynolds, A. M. and Frye, M. a** (2007). Free-flight odor tracking in *Drosophila* is consistent with an optimal  
633 intermittent scale-free search. *PLoS One* **2**, e354.
- 634 **Ristroph, L., Bergou, A. J., Ristroph, G., Coumes, K., Berman, G. J., Guckenheimer, J., Wang, Z. J. and**  
635 **Cohen, I.** (2010). Discovering the flight autostabilizer of fruit flies by inducing aerial stumbles. *Proc. Natl.*  
636 *Acad. Sci.* **107**, 4820–4.

- 637 **Sane, S. P. and Dickinson, M. H.** (2002). The aerodynamic effects of wing rotation and a revised quasi-steady  
638 model of flapping flight. *J. Exp. Biol.* **205**, 1087–1096.
- 639 **Schilstra, C. and Hateren, J.** (1999). Blowfly flight and optic flow. I. Thorax kinematics and flight dynamics. *J.*  
640 *Exp. Biol.* **1490**, 1481–1490.
- 641 **Schnell, B., Weir, P. T., Roth, E., Fairhall, A. L. and Dickinson, M. H.** (2014). Cellular mechanisms for integral  
642 feedback in visually guided behavior. *Proc. Natl. Acad. Sci. U. S. A.* **111**, 5700–5.
- 643 **Sherman, A. and Dickinson, M. H.** (2003). A comparison of visual and haltere-mediated equilibrium reflexes in  
644 the fruit fly *Drosophila melanogaster*. *J. Exp. Biol.* **206**, 295–302.
- 645 **Stewart, F. J., Baker, D. a and Webb, B.** (2010). A model of visual-olfactory integration for odour localisation in  
646 free-flying fruit flies. *J. Exp. Biol.* **213**, 1886–900.
- 647 **Tammero, L. F.** (2004). Spatial organization of visuomotor reflexes in *Drosophila*. *J. Exp. Biol.* **207**, 113–122.
- 648 **Tammero, L. F. and Dickinson, M. H.** (2002). The influence of visual landscape on the free flight behavior of the  
649 fruit fly *Drosophila melanogaster*. *J. Exp. Biol.* **205**, 327–43.
- 650 **Van Breugel, F. and Dickinson, M. H.** (2014). Plume-tracking behavior of flying *Drosophila* emerges from a set of  
651 distinct sensory-motor reflexes. *Curr. Biol.* **24**, 274–86.
- 652 **Van Breugel, F., Dickinson, M. H. and Breugel, F. Van** (2012). The visual control of landing and obstacle  
653 avoidance in the fruit fly *Drosophila melanogaster*. *J. Exp. Biol.* **215**, 1783–98.
- 654 **Wagner, H.** (1986). Flight Performance and Visual Control of Flight of the Free-Flying Housefly (*Musca*  
655 *Domestica* L.) III. Interactions Between Angular Movement Induced by Wide- and Smallfield Stimuli. *Philos.*  
656 *Trans. R. Soc. B Biol. Sci.* **312**, 581–595.
- 657 **Wehrhahn, C., Poggio, T. and Bühlhoff, H.** (1982). Tracking and chasing in houseflies (*Musca*). *Biol. Cybern.*  
658 **130**, 123–130.
- 659 **Yun, X. and Bachmann, E. R.** (2006). Design, Implementation, and Experimental Results of a Quaternion-Based  
660 Kalman Filter for Human Body Motion Tracking. *IEEE Trans. Robot.* **22**, 1216–1227.

661

662 

## Figure Legends

663 **Figure 1:** Experimental setup, coordinate system conventions, and flight tracks of saccades. (A)

664 The experimental setup consists of a cylindrical enclosure, three synchronized high-speed

665 cameras with IR LED backlighting, and a laser triggering system. (B) An automated machine

666 vision system tracks kinematics by projecting body and wing models onto the three orthogonal

667 camera images. (C) Measured parameters in the body reference frame. Body dynamics are

668 described by the angular velocity vector of the body,  $\boldsymbol{\Omega} = \{\omega_x, \omega_y, \omega_z\}$  and its derivatives, about

669 the principal body axes  $\mathbf{X}_B = \{x_B, y_B, z_B\}$ . Wing kinematics are defined by stroke angle within the  
 670 stroke plane,  $\phi$ , deviation angle out of the stroke plane,  $\gamma$ , and wing rotation angle,  $\alpha$ . Based on  
 671 the vector sum of body acceleration and the gravitational acceleration vector, we determined  
 672 normalized force vector,  $\mathbf{F}$ , with orientation in the body reference frame defined as force pitch  
 673 angle,  $\beta$ , and roll angle,  $\xi$ . (D) Temporal dynamics of the wing kinematics angles for a single  
 674 wingbeat. The black trace shows the average steady wingbeat of *D. hydei* that is used as a  
 675 baseline for our analysis (from Muijres et al., 2014). Grey traces show hypothetical wing angles:  
 676 stroke angle has a phase shift of  $\Delta\tau = 5^\circ$  relative to the steady wingbeat, wing deviation has a  
 677 mean deviation angle shift of  $\Delta\gamma = 5^\circ$ , and wing rotation angle has both a shift of  $\Delta\tau = 5^\circ$  and  $\Delta\alpha$   
 678  $= 5^\circ$ . (E,F) Side view (E) and top view (F) of the flight tracks of all 44 trials. Traces are color-  
 679 coded with time according to the scale bar in (E). Note that all left-handed turns have been  
 680 mirrored into right-handed turns, and all sequences were aligned according to position and  
 681 heading at the start of the saccadic maneuver ( $t_{\text{start}} = 0$  ms).

682  
 683 **Figure 2:** Saccades in flies consist of banked turns. (A) Heading and speed (depicted as vectors  
 684 of horizontal velocity component) after the saccades for all measured trials separately (grey) and  
 685 its mean (black solid vector), relative to the aligned initial zero heading (black dotted mean  
 686 velocity vector). Speed is scaled according to the reference vector of 0.1 m/s. (B-L) temporal  
 687 dynamics of experimental parameters. (B) Heading relative to initial heading of  $0^\circ$ ,  $\sigma$ . (C)  
 688 Changes in flight speed relative to initial flight speed,  $dU$ , (D) Direction of the horizontal  
 689 component of body acceleration in the world reference frame,  $\sigma_a$ . (E) Horizontal component of  
 690 normalized body acceleration,  $a_{\text{hor}}/g$ . (F) Vertical component of normalized body acceleration,  
 691  $a_z/g$  (negative values are shown such that upwards accelerations are in the positive y axis

692 direction). (G-I) Normalized roll rate (G), pitch rate (H), and yaw rate (I). (J)  $|F|$ , normalized  
693 aerodynamic force generated by the fruit fly. (K,L)  $\xi$ , roll angle (K), and  $\beta$ , pitch angle (L) of  $F$   
694 (see also Fig. 1C). In B-L, grey traces depict data from separate trials and the black traces with  
695 grey bars show the mean and 95% confidence interval for all trials.

696

697 **Figure 3:** Throughout a saccade, flies produce torque about all body axes, the roll axis, pitch  
698 axis, and yaw axis. The total normalized body torque (A-C) is the sum of torques required to  
699 resist aerodynamic damping (D-F) and to resist inertia (G, H). All torques are defined in the body  
700 reference frame (Figure 1C) and normalized by  $|a+g|ml$ . Grey lines show data from the separate  
701 saccades, black lines with grey bars are means and 95% confidence intervals for all trails.

702

703 **Figure 4:** The early stage of a saccade can be separated into two phases, an initial body rotation  
704 ( $-25\text{ms} < t < -5\text{ms}$ , data in blue) and a counter-rotation ( $30\text{ms} < t < 60\text{ms}$ , data in orange). During  
705 each phase, flies produce torque about two body axes and keep torque about the third orthogonal  
706 axis to a minimum. (A) Direction of torque within the stroke plane,  $\mu$ , throughout the saccade.  
707 (B) Vectors depicting orientation and magnitude of torque component within the stroke plane,  
708  $T\mu$ , during the initial rotation phase (blue) and during the counter-rotation phase (orange) (see  
709 (A) for the time windows). The black dashed vectors are mean  $T\mu$  for both time windows,  
710 defining the primary torque axis ( $\mu_1=36^\circ$ ) and the counter-torque axis ( $\mu_2=8^\circ$ ). Normalized  
711 torque vectors are scaled according to the reference vector of 0.01. (C) Torque about the primary  
712 torque axes  $\mu_1$  ( $t < 12.5\text{ms}$ ) and the counter-torque axis  $\mu_2$  ( $t > 12.5\text{ms}$ ). (D) Torque about the  
713 orthogonal axes  $\mu_{1\perp}$  ( $t < 12.5\text{ms}$ ) and  $\mu_{2\perp}$  ( $t > 12.5\text{ms}$ ). (E) Torque about the yaw axis. (F) Average  
714 magnitude of normalized body torque relative to turn angle  $\Delta\sigma$  about the  $\mu_1$  (blue) and  $\mu_2$



715 (orange) axes. (G) Torques about their orthogonal  $\mu_{1\perp}$  and  $\mu_{2\perp}$  axes. (H) Torque about the yaw  
716 axis. All torques are defined in a right-handed reference frame relative to the  $\mu_1$ ,  $\mu_2$  and yaw axes  
717 and were normalized by  $|\mathbf{a}+\mathbf{g}|ml$ . In A, C, D, and E, grey lines show data from all measured  
718 saccades, and black lines with grey bars are means and 95% confidence intervals.

719

720 **Figure 5:** The average wing and body kinematics, determined by aligning the wingbeats of all  
721 trials relative to the start of each saccade, show that flies produce aerodynamic torques  
722 throughout a saccade using small changes in their wing movement patterns. (A) Wingbeat  
723 frequency  $f$ , (mean and 95% confidence interval). (B) Stroke angle,  $\phi$ , for the left (blue) and right  
724 (red) wing. (C) Difference in stroke angle at the end of the downstroke (blue) and upstroke  
725 (orange). (D) Deviation angle,  $\gamma$ . (E) Difference in deviation angle amplitude during the  
726 downstroke (blue) and upstroke (orange). (F) wing rotation angle,  $\alpha$ . (G) Difference in wing  
727 rotation angle at mid-downstroke (blue) and mid-upstroke (orange). (H) Normalized stroke-  
728 averaged force,  $|\mathbf{F}|$ , based on body accelerations (black trace for mean and grey bar for 95%  
729 confidence interval) and based on wing kinematics shown in B, D, and F (green trace). (I-K)  
730 Normalized roll torque,  $T_{\text{roll}}$  (I), pitch torque,  $T_{\text{pitch}}$  (J), and yaw torque,  $T_{\text{yaw}}$  (K). Plotting  
731 conventions in (I-K) are the same as in H.

732

733 **Figure 6.** Average wing kinematics angles and torque for wingbeats that generate peak torque  
734 about the control axes. (A-C) Kinematics angles for the left wing (blue) and for the right wing  
735 (red) for strokes that generated peak yaw torque (A), peak  $\mu_1$  torque (B), and peak  $\mu_2$  torque (C).  
736 (D) Normalized yaw torque measured by replaying wingbeat kinematics in panel A (black) and  
737 the steady flight kinematics in Fig. 1D (grey) on the robotic fly model. Solid lines are time series

738 throughout the wingbeat, dotted lines are stroke-averaged values. (E) Normalized torque about  
739 the  $\mu_1$  axis for the kinematics in panel B (blue), normalized torque about the  $\mu_2$  axis for the  
740 kinematics in C (orange), and torque about the  $\mu_1$  and  $\mu_2$  axes for the steady flight wingbeat  
741 kinematics in Fig. 1D (black and grey, respectively). Note that the black and grey traces are so  
742 similar that they appear to be a single line. (F) Normalized torques about the  $\mu_{1\perp}$  and  $\mu_{2\perp}$  axes,  
743 using the color conventions as in E.

744

745 **Figure 7:** Torques derived from body dynamics plotted against stroke-averaged torques  
746 measured using a robotic fly. The data are based on a graded series of wing kinematics that range  
747 from steady wingbeats to those that produce peak torque about the  $\mu_1$ ,  $\mu_2$ , and yaw axes as shown  
748 in Fig. 6A-C. (A) Comparison of torque about the three principal body axes: yaw (black), roll  
749 (red), and pitch (blue), for the kinematics correlated with yaw production. (B) Comparison of  
750 torque about the  $\mu_1$  (blue), the  $\mu_2$  (orange),  $\mu_{1\perp}$  (grey),  $\mu_{2\perp}$  (also grey), and yaw (black) axes.  
751 Positive values are for the kinematics correlated with control of torque about the  $\mu_1$  axis;  
752 negative values are for the kinematics that controls torque about the  $\mu_2$  axis. (C) Torques  
753 produced by varying the different wing kinematics parameters correlated with yaw torque control  
754 in isolation while maintaining all others at steady flight conditions. The effect of the different  
755 parameters is shown in blue (stroke angle,  $\phi$ ), magenta (deviation angle  $\gamma$ ), and green (rotation  
756 angle  $\alpha$ ). The grey trace is the sum of the torques for the separate cases; the red trace shows the  
757 case where all kinematics angles were varied together. The thin black solid line in all panels  
758 shows a match between torques determined from body dynamics and from wing kinematics  
759 played through the robot. (D) The same analysis as in C, but using the kinematics correlated  
760 with the control of torque about the  $\mu_1$  axis (positive values) and the  $\mu_2$  axis (negative values).

761

762 **Figure 8:** Flies modulate the phase of wing rotation to control torque about the  $\mu_1$  and  $\mu_2$  axes,

763 and modulate both the phase and offset of wing rotation to control torque about the yaw axis. (A)

764 Wing rotation angles of the right wing (red), left wing (grey), and left wing trace (blue dotted)

765 that has been translated along both abscissa (wingbeat phase) and ordinate (rotation angle) to

766 produce the lowest RMSE between the right and shifted left wing traces. (B) A plot of RMSE as

767 a function of plot of wingbeat phase ( $-10^\circ < \Delta \tau < 10^\circ$ ) and mean wing rotation angle

768 ( $-10^\circ < \Delta \alpha < 10^\circ$ ) for the kinematics correlated with peak yaw torque. Maximum correlation

769 (minimum RMSE) is depicted by a white dot. RMSE is coded in grey on a logarithmic scale. (C

770 and D) The same analysis as in A and B, but for the data correlated with peak torque about the  $\mu_1$

771 axis. (E and F) The same analysis as in A and B, but for the data correlated with peak torque

772 about the  $\mu_2$  axis.

### 773 Supplementary Figure Legends

774 **Figure S1:** Temporal dynamics of body rotations throughout the saccadic maneuver. Rotational

775 dynamics of the fly body are described as angular positions (A-C), normalized angular velocities

776 (D-F) and normalized angular accelerations (G-I) about the principal body axes (roll axis, pitch

777 axis and yaw axis as defined in Fig. 1C). The temporal dynamics of the angular positions were

778 estimated by integrating angular velocities in the body reference frame (integration constant was

779 set to zero at the start of each track); angular velocities were normalized by the wingbeat

780 frequency at steady flight,  $f_{\text{steady}}$ , estimated by Muijres et al. (2014); angular accelerations were

781 estimated by differentiating angular velocities, and were normalized by the steady wingbeat

782 frequency  $f_{\text{steady}}^2$ . Grey lines show data from all measured saccades, and black lines with grey

783 bars are means and 95% confidence intervals for all trails.

784

785 **Figure S2:** Torque dynamics within the stroke plane throughout the saccadic maneuver,  
786 described by torque about the primary torque axis  $\mu_1$  (A), the counter-torque axis  $\mu_2$  (B) and their  
787 respective orthogonal axes  $\mu_{1\perp}$  (C) and  $\mu_{2\perp}$  (D). All torques are normalized by  $|a+g|ml$ ; grey  
788 lines show data from the separate saccades, and black lines with grey bars are means and 95%  
789 confidence intervals for all trails. The vertical dotted line defines the point in time where torque  
790 in the stroke plane is approximately zero, and that therefore separates the primary rotation phase  
791 and the counter-rotation phase ( $t=12.5$  ms).

792

793 **Figure S3:** Correlation between wingbeat kinematics angles of the left and right wing, for the  
794 kinematics that results in peak yaw torque (left column), peak torque about the primary  $\mu_1$  axis  
795 (middle column), and peak torque about the counter-torque axis  $\mu_2$  (right column). (A-C)  
796 kinematics angles of the right wing (red), the original kinematics of the left wing (grey), and the  
797 translated left wing kinematics for which correlation between the wingbeat kinematics angles of  
798 the left and right wing were maximal (blue dotted traces). (D-L) root-mean square error (RMSE)  
799 based on the difference between the left and right wing kinematics angle throughout the  
800 measured phase shift range  $-10^\circ < \Delta\tau < 10^\circ$  and mean kinematics angle shift range  $-10^\circ < \Delta\kappa < 10^\circ$   
801 (maximum correlation at minimum RMSE is depicted by a white dot): (D-F) for stroke angle;  
802 (G-I) for deviation angle; (J-L) for wing rotation angle. Logarithmic values of RMSE are scaled  
803 according to the scale bar in (L).

## Supplementary Movie Legends

804  
805  
806  
807  
808  
809  
810  
811  
812  
813  
814  
815  
816  
817  
818  
819  
820  
821  
822  
823  
824  
825  
826  
827

**Movie S1:** Top view of a fruit fly performing a saccadic maneuver. The movie is slowed down 100 times, and every third recorded frame is shown. The turn angle of this saccade is approximately 90 degrees, which is close to the average saccadic turn angle for all trails.

**Movie S2:** Body and wings model of a fruit fly performing a saccadic maneuver. The movie is slowed down 300 times. The turn angle of this saccade is approximately 90 degrees, which is close to the average saccadic turn angle for all trails.

**Movie S3:** A movie of all 44 flight tracks overlaid on top of each other, viewed from below. The movie is slowed down 100 times, and traces are color-coded with time according to the scale bar in Fig. 1E. Note that all left-handed turns have been mirrored into right-handed turns, and all sequences were aligned according to position and heading at the start of the saccadic maneuver ( $t_{\text{start}} = 0$  ms).

**Movie S4:** A movie of all 44 flight tracks overlaid on top of each other, viewed from the side as shown in Fig. 1F. The movie is slowed down 100 times, and traces are color-coded with time according to the scale bar in Fig. 1E. Note that all left-handed turns have been mirrored into right-handed turns, and all sequences were aligned according to position and heading at the start of the saccadic maneuver ( $t_{\text{start}} = 0$  ms).

**Movie S5:** A movie of all 44 flight tracks overlaid on top of each other, viewed from the front. The movie is slowed down 100 times, and traces are color-coded with time according to the scale bar in Fig. 1E. Note that all left-handed turns have been mirrored into right-handed turns, and all

828 sequences were aligned according to position and heading at the start of the saccadic maneuver  
829 ( $t_{\text{start}} = 0$  ms).

830

831 **Movie S6:** A movie of all 44 flight tracks overlaid on top of each other, in perspective view. The  
832 movie is slowed down 100 times, and traces are color-coded with time according to the scale bar  
833 in Fig. 1E. Note that all left-handed turns have been mirrored into right-handed turns, and all  
834 sequences were aligned according to position and heading at the start of the saccadic maneuver  
835 ( $t_{\text{start}} = 0$  ms).

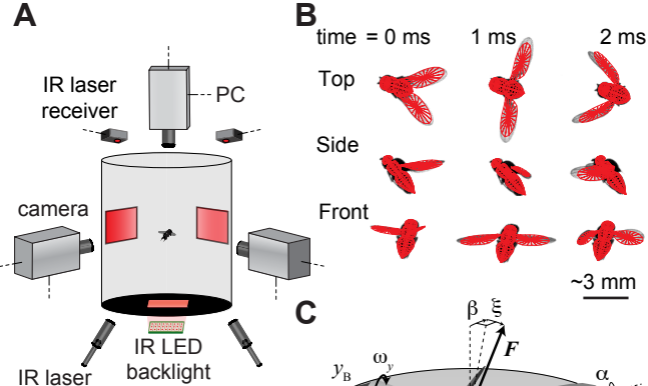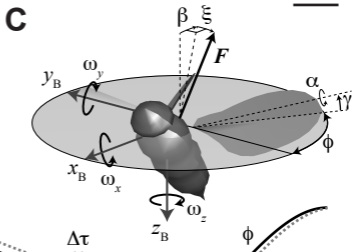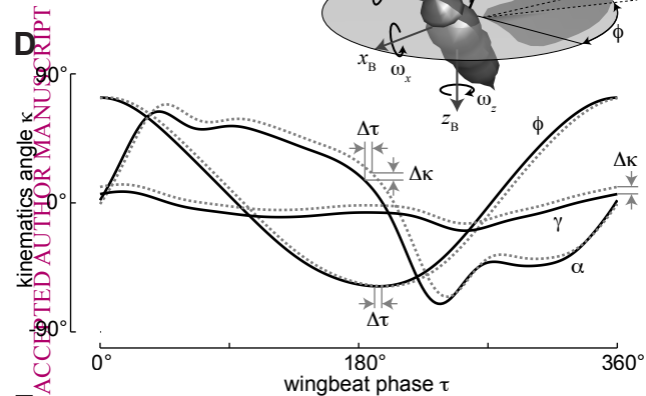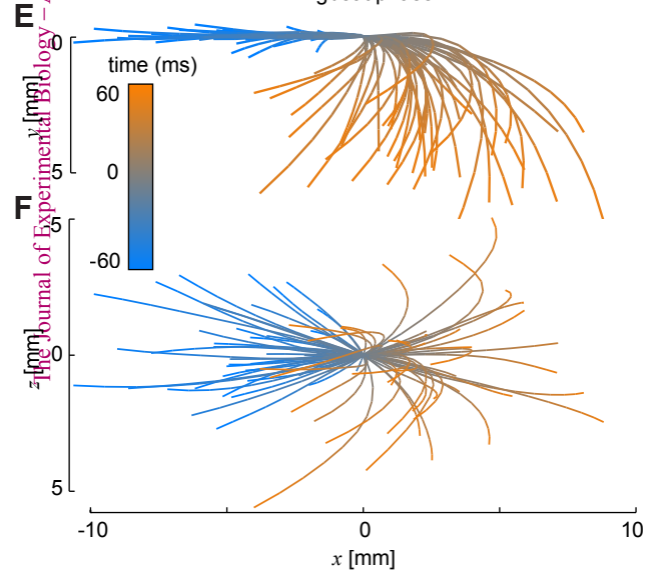

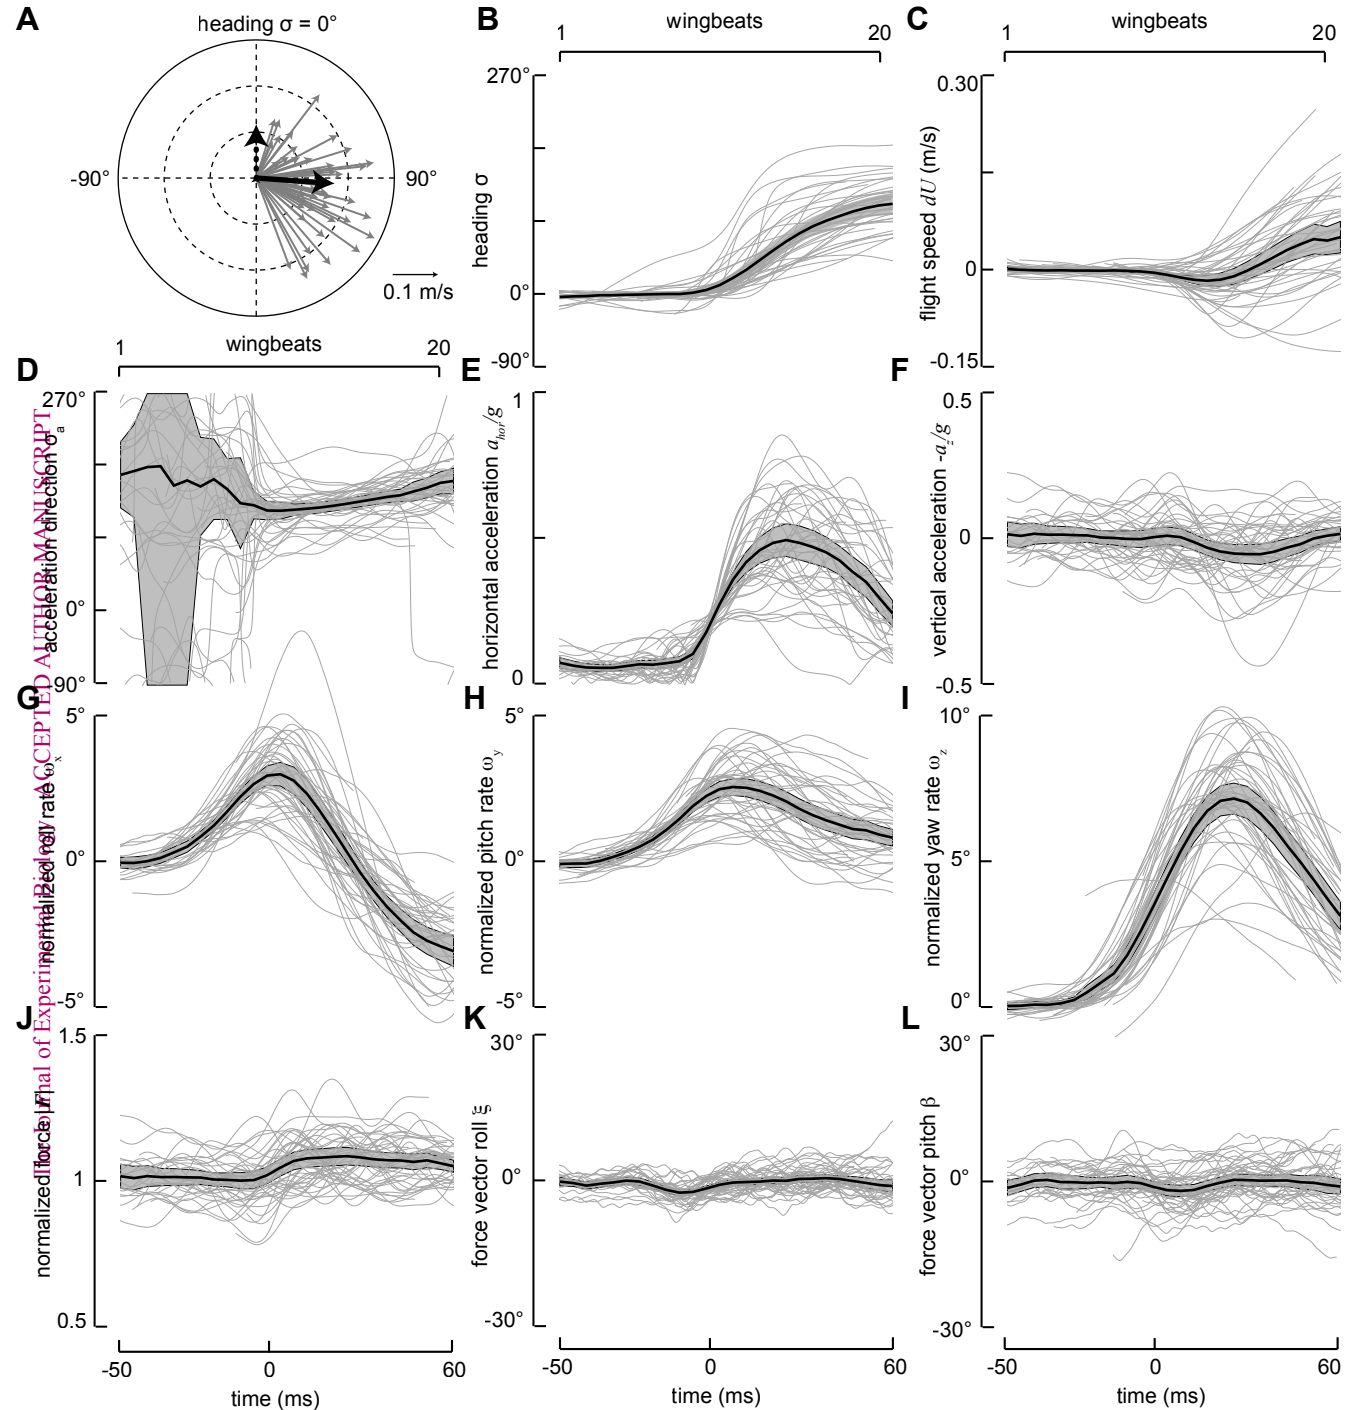



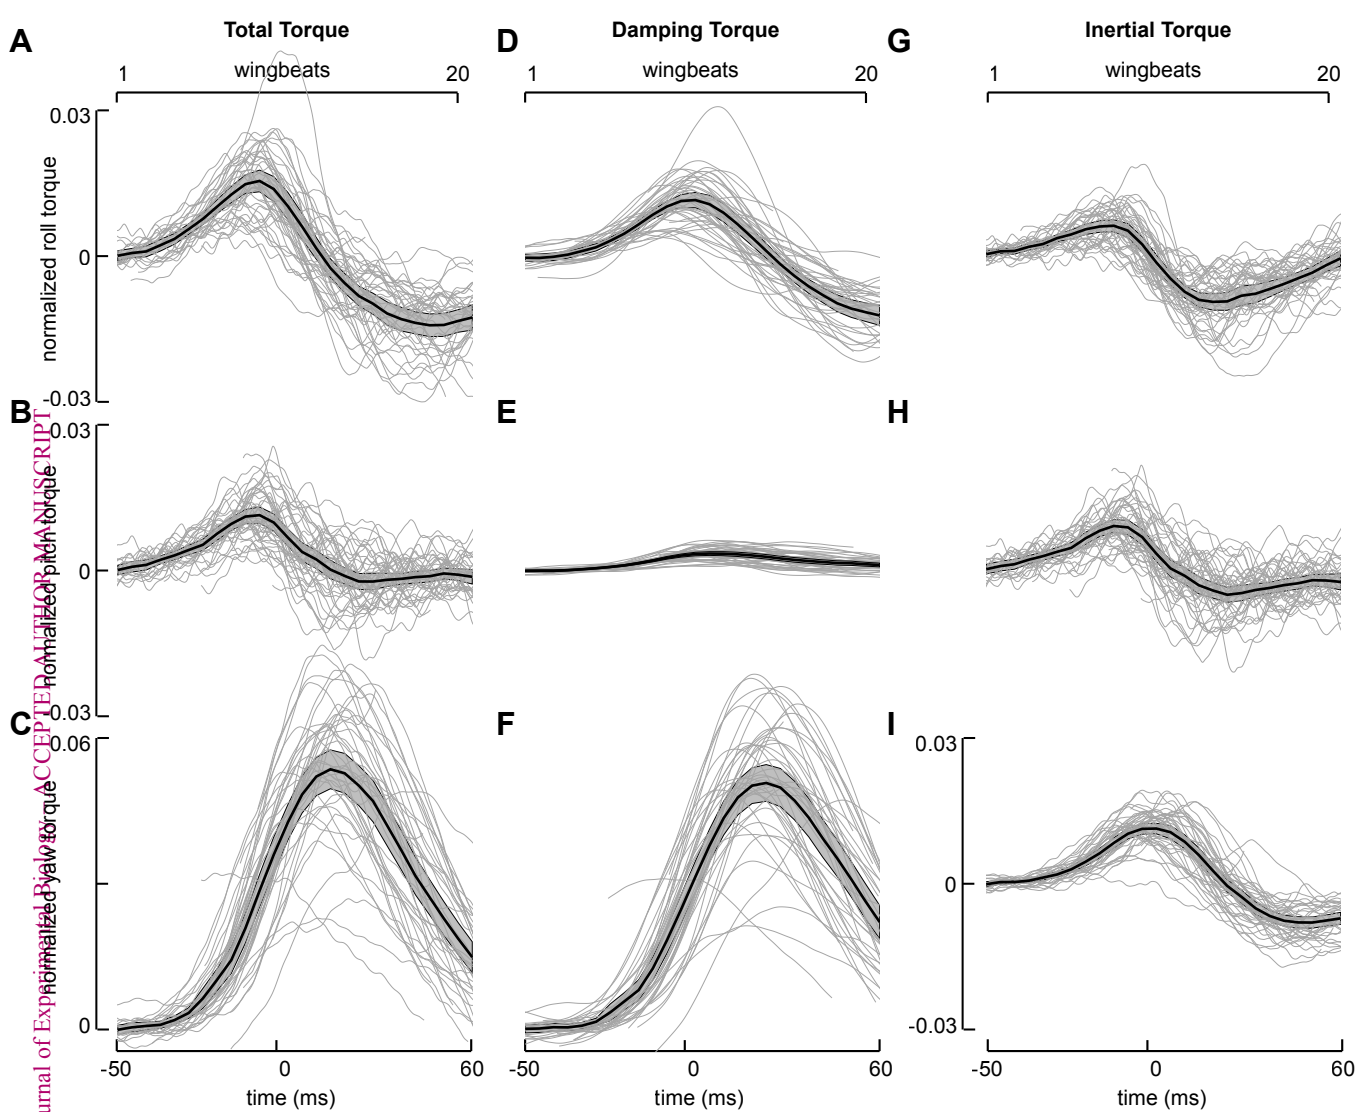

The Journal of Experimental Biology  
ACCEPTED MANUSCRIPT  
Normalized yaw torque

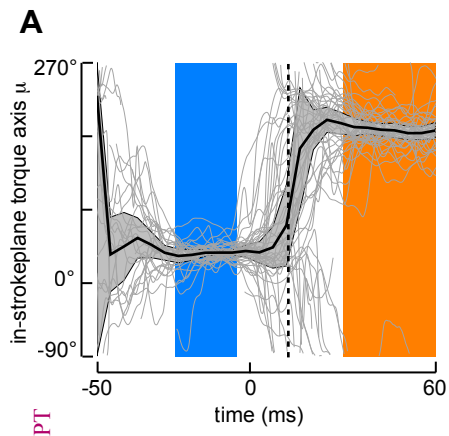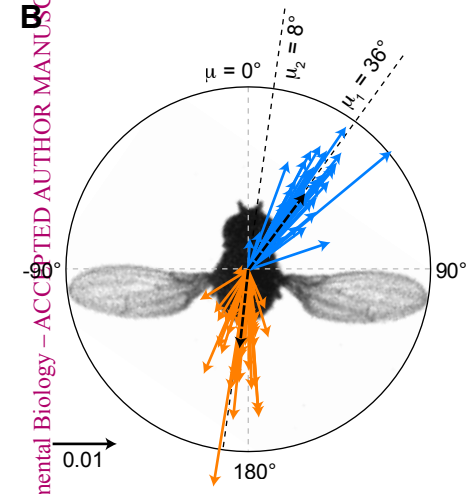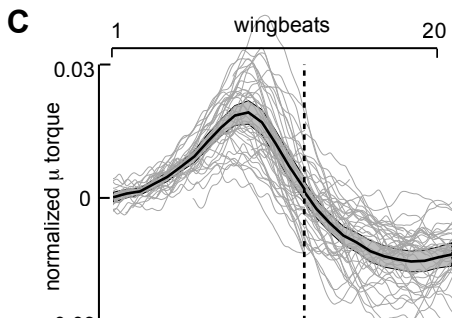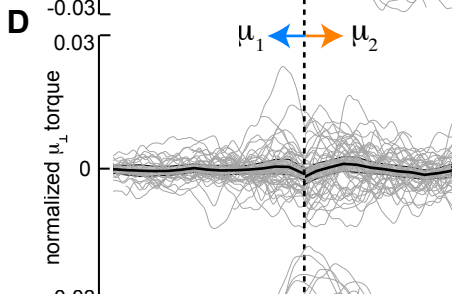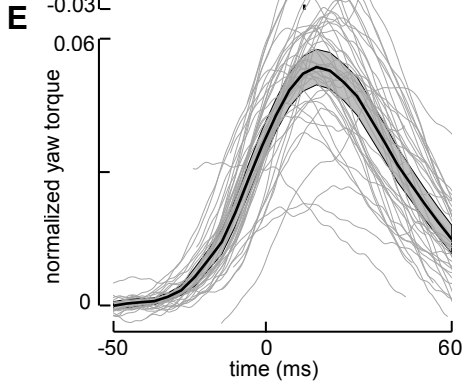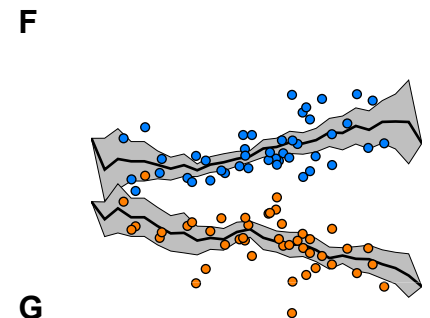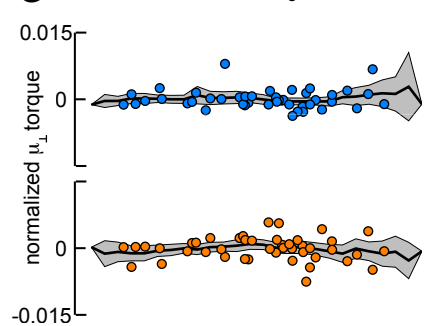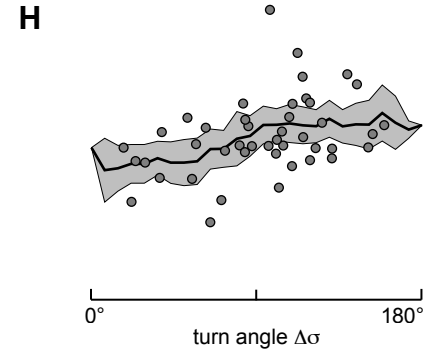

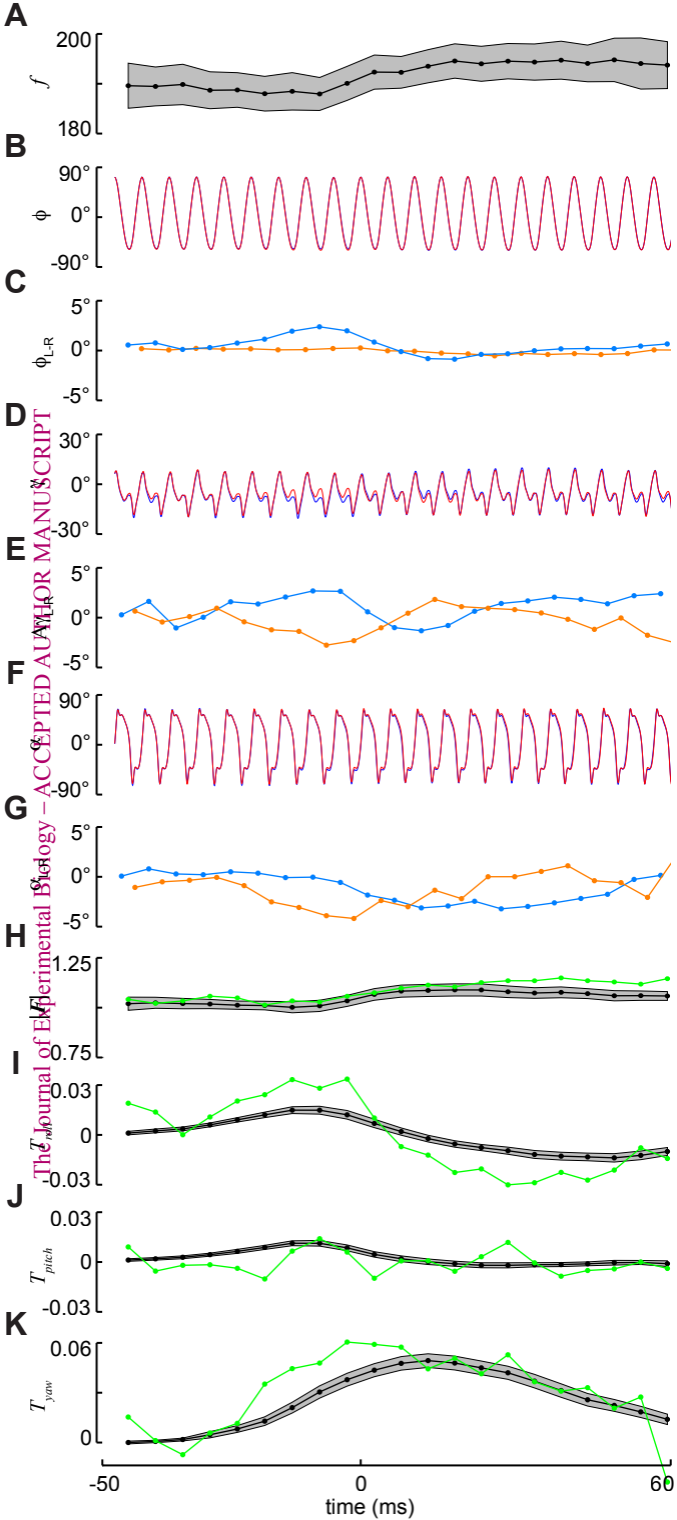

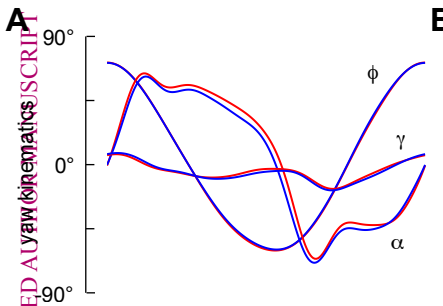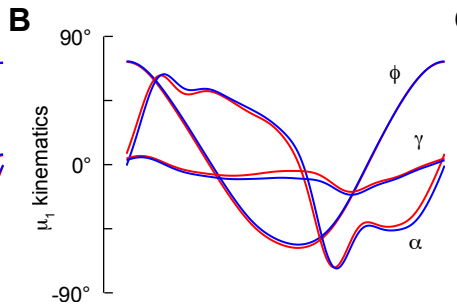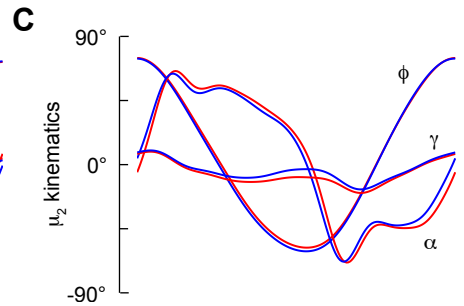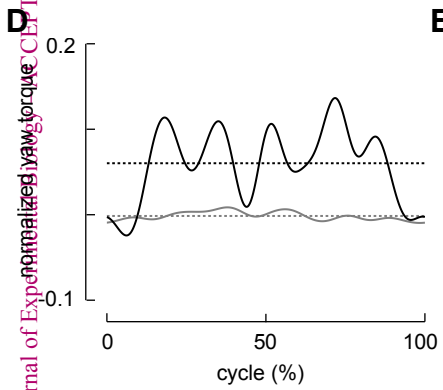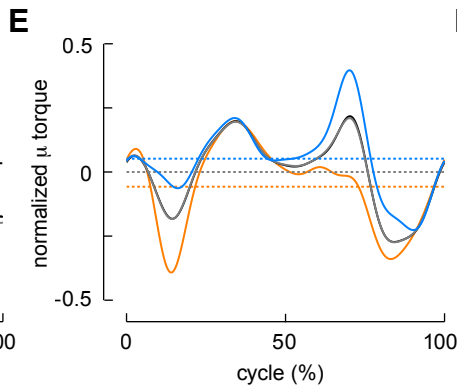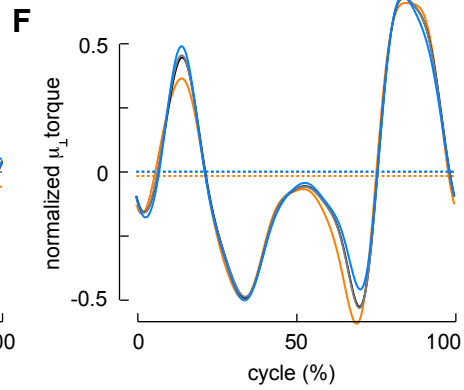

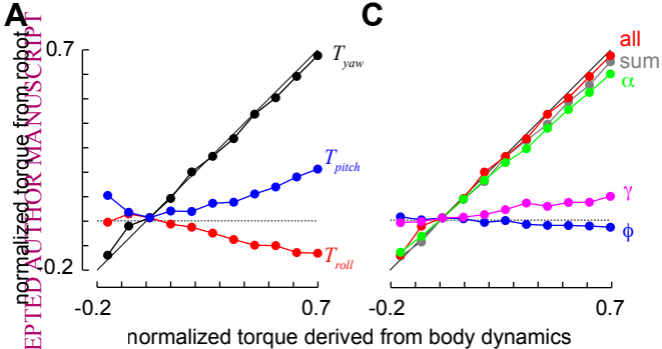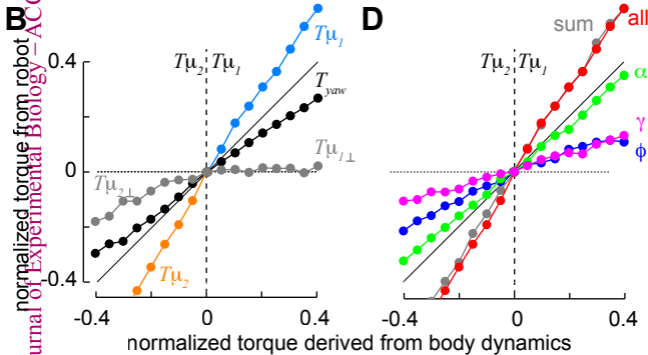

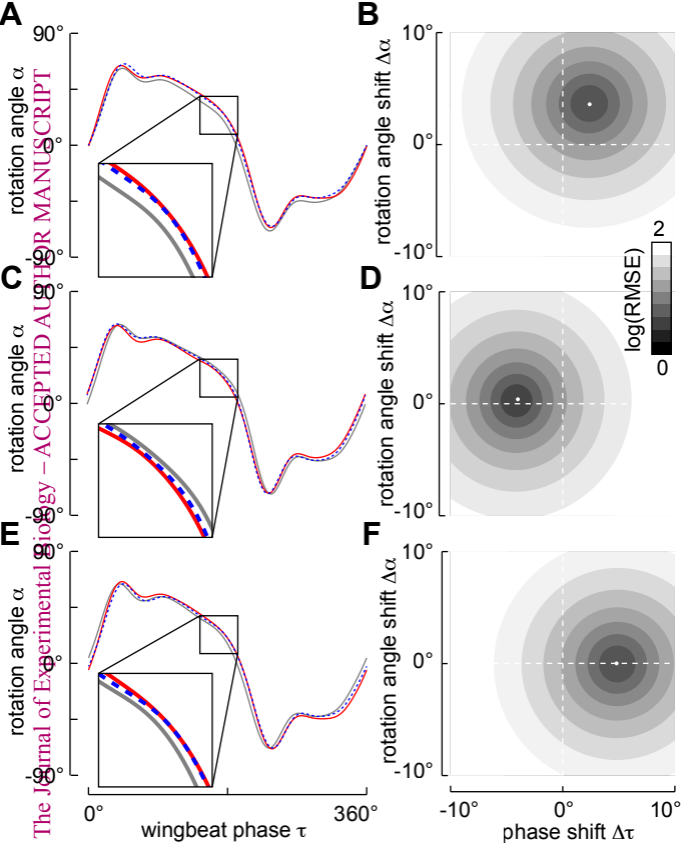

Source: https://cob.silverchair.com/jeb/article-pdf/doi/10.1242/jeb.114280/2033151/jeb_114280.pdf
